# Supplementary material for: Identifying serum metabolite biomarkers for autoimmune diseases: a two-sample mendelian randomization and meta-analysis
Source: Front Immunol. 2024 Apr 15;15:1300457. doi: 10.3389/fimmu.2024.1300457 (PMC11056515; doi:10.3389/fimmu.2024.1300457)
Supplement: Supplementary file 1 [file DataSheet_1.xlsx]

## Sheet: supplementary table1
Supplementary Table 1. Autoimmune diseases GWAS samples used in this study.
Stage	Trait	N.case	N.controls	Populations	SNPs	Index
Discovery	IBD	12882	21770	European	12716084	ieu-a-31
	RA	1605	359589	European	10079899	ukb-d-M13_RHEUMA
	SLE	1311	1783	European	489877	ieu-a-815
	T1D	9266	15574	European	12783129	ebi-a-GCST010681
	DM	208	213145	European	16380451	finn-b-M13_DERMATOPOLY
	CeD	4533	10750	European	523399	ebi-a-GCST000612
Validation	IBD	25042	25042	0.9 European	9619016	ebi-a-GCST004131
	RA	1401	359793	European	9944222	ukb-d-M06
	SLE	5201	9066	European	7071163	ebi-a-GCST003156
	T1D	2542	182573	European	16380230	finn-b-T1D_STRICT
	DM	201	172834	European	16380281	finn-b-DERMATOPOLY_FG
	CeD	3796	8154	European	231359	ieu-a-1060

## Sheet: supplementary table2
Supplementary Table 2. Significant MR analysis results in the replication samples
Methods	Outcomes	Exposure	Categroy	No.SNP	OR	95% CI low	95% CI high	P	PFDR
IVW	CeD	1-oleoylglycerophosphoethanolamine	Lipid	4	14.3594	1.72425	119.584	0.0137485	0.0412456
Weighted Median					21.4985	1.36065	339.679	0.0293542	0.0587085
MR-Egger					200.454	3.36337e-07	1.19468e+11	0.697658	0.697658
Simple Mode					30.9126	1.15262	829.055	0.177562	0.234596
Weighted Mode					31.67	0.922957	1086.71	0.195497	0.234596
MR-PRESSO					13.5214	2.63325	40.5632	0.0123658	0.0412456
IVW	DM	betaine	Amino acid	22	0.0213951	0.000886342	0.51645	0.0179434	0.0538303
Weighted Median					0.103481	0.00109109	9.81427	0.328733	0.493099
MR-Egger					0.00445207	3.0192e-06	6.56497	0.16213	0.324261
Simple Mode					0.164383	6.40462e-05	421.91	0.656987	0.656987
Weighted Mode					0.0851782	5.70535e-05	127.167	0.51645	0.619739
MR-PRESSO					0.0213951	0.00125661	0.364275	0.00785528	0.0471317
IVW	IBD	1-arachidonoylglycerophosphoethanolamine*	Lipid	26	0.58327	0.392037	0.867784	0.00782303	0.0218462
Weighted Median					0.418533	0.237624	0.737171	0.0025627	0.0153762
MR-Egger					0.188461	0.055171	0.643772	0.0145641	0.0218462
Simple Mode					0.344752	0.114639	1.03677	0.0712096	0.0712096
Weighted Mode					0.34016	0.143868	0.804273	0.0224085	0.0268902
MR-PRESSO					0.58327	0.378884	0.897909	0.014316	0.0218462
IVW	IBD	arachidonate (20:4n6)	Lipid	20	0.535023	0.2985	0.95896	0.00356627	0.0213976
Weighted Median					0.670427	0.311844	1.44134	0.305895	0.576104
MR-Egger					0.656342	0.17797	2.42055	0.535549	0.642659
Simple Mode					0.51992	0.123562	2.1877	0.384069	0.576104
Weighted Mode					0.777123	0.25768	2.34368	0.659699	0.659699
MR-PRESSO					0.535023	0.286233	1.00006	0.0500166	0.15005
IVW	RA	1-myristoylglycerophosphocholine	Lipid	6	1.00886	1.0035	1.01424	0.00116013	0.00348039
Weighted Median					1.00977	1.00293	1.01665	0.00502355	0.0100471
MR-Egger					1.01254	0.999667	1.02558	0.128893	0.128893
Simple Mode					1.01002	1.00009	1.02005	0.104848	0.125818
Weighted Mode					1.0101	1.0024	1.01785	0.049811	0.0747166
MR-PRESSO					1.00886	1.00366	1.01409	0.00082601	0.00348039
IVW	RA	glycerol	Lipid	18	0.990841	0.984866	0.996853	0.00286913	0.0172148
Weighted Median					0.993249	0.9856	1.00096	0.0859403	0.171881
MR-Egger					0.999136	0.987415	1.011	0.887632	0.887632
Simple Mode					0.99303	0.983016	1.00315	0.193949	0.232739
Weighted Mode					0.993855	0.986167	1.0016	0.138231	0.207346
MR-PRESSO					0.990841	0.984087	0.997642	0.00837997	0.0251399
IVW	SLE	2-methoxyacetaminophen sulfate*	Xenobiotics	97	0.974751	0.948524	0.99102	0.010503	0.0630181
Weighted Median					1.04823	0.936729	1.17301	0.411694	0.823388
MR-Egger					1.04673	0.85189	1.28614	0.664825	0.889857
Simple Mode					0.964751	0.763556	1.21896	0.764276	0.889857
Weighted Mode					1.01098	0.866547	1.17949	0.889857	0.889857
MR-PRESSO					1.0737	0.984439	1.17105	0.10831	0.324931
IVW	T1D	glycerol 2-phosphate	Xenobiotics	21	3.33792	1.12573	6.9082	0.0314844	0.128798
Weighted Median					0.376752	0.0841905	1.68596	0.201673	0.242007
MR-Egger					0.431228	0.0439966	4.22664	0.478927	0.478927
Simple Mode					0.128073	0.0103811	1.58005	0.124577	0.242007
Weighted Mode					0.33263	0.06614	1.67286	0.196666	0.242007
MR-PRESSO					0.337919	0.118197	0.966092	0.0429326	0.128798

## Sheet: supplementary table3
Supplementary Table 3. Sensitivity analysis results of mendelian randomization
Disease	id.exposure	id.outcome	exposure	nsnp	FEV	F_min	b_Inverse.variance.weighted	se_Inverse.variance.weighted	pval_Inverse.variance.weighted	b_Weighted.median	se_Weighted.median	pval_Weighted.median	b_MR.Egger	se_MR.Egger	pval_MR.Egger	Q_MR.Egger	Q_df_MR.Egger	Q_pval_MR.Egger	Q_Inverse.variance.weighted	Q_df_Inverse.variance.weighted	Q_pval_Inverse.variance.weighted	egger_intercept	se	pval	correct_causal_direction	steiger_pval
IBD1	BCa5Gq	ieu-a-31	M35186.metal.pos.txt.gz	26	0.116791	19.42	-0.888525	0.226945	9.03e-05	-1.04547	0.341112	0.00217757	-1.94669	0.602788	0.00357584	18.8348	24	0.760742	22.4253	25	0.611081	0.0192609	0.0101648	0.0702182	TRUE	2.59e-136
IBD1	TE7zvY	ieu-a-31	M01110.metal.pos.txt.gz	20	0.124569	19.7477	-1.04389	0.300506	0.000513229	-1.25686	0.334933	0.000175031	-1.53083	0.502371	0.00693442	24.8749	18	0.128402	26.8712	19	0.107688	0.0111237	0.00925486	0.244967	TRUE	6.79e-138
IBD1	UQpxmD	ieu-a-31	M35189.metal.pos.txt.gz	16	0.15718	19.7238	0.421379	0.126	0.000824997	0.522217	0.148495	0.000436907	0.38988	0.237572	0.123042	16.6365	14	0.276069	16.6663	15	0.339199	0.00171971	0.0108453	0.876274	TRUE	3.49e-177
IBD1	Z3KpJI	ieu-a-31	M21188.metal.pos.txt.gz	25	0.109715	19.4193	0.821554	0.273641	0.00267946	0.429259	0.37533	0.252754	0.401998	0.762107	0.60291	28.569	23	0.195027	29.003	24	0.220019	0.00728077	0.0123178	0.560234	TRUE	1.88e-110
IBD1	8PfeNy	ieu-a-31	M32489.metal.pos.txt.gz	37	0.128537	19.2571	-0.86913	0.327349	0.00792947	-1.24815	0.479499	0.00924068	-1.25386	1.09395	0.259501	39.8461	35	0.263245	40.0012	36	0.296984	0.00390181	0.0105734	0.714336	TRUE	5.77e-147
IBD1	zFDXMQ	ieu-a-31	M32980.metal.pos.txt.gz	11	0.068933	19.7962	-0.70831	0.268185	0.00826303	-0.659208	0.379901	0.0827039	-0.742619	0.737984	0.340567	11.0162	9	0.274601	11.0193	10	0.356017	0.00098592	0.01959	0.960961	TRUE	2.71e-67
IBD1	d6QG7O	ieu-a-31	M38178.metal.pos.txt.gz	10	0.0704435	19.1649	0.63218	0.248851	0.0110726	0.833966	0.268124	0.00186853	1.22997	0.472125	0.0313639	9.36873	8	0.312152	11.8616	9	0.221223	-0.020944	0.0143549	0.182681	TRUE	1.1e-81
IBD1	Cmc17P	ieu-a-31	M34109.metal.pos.txt.gz	34	3.51289	19.6042	0.0321368	0.0129506	0.0130832	0.0382829	0.0187981	0.0416969	0.0494698	0.0221382	0.0325548	33.6443	32	0.387737	34.6251	33	0.39024	-0.0104486	0.0108179	0.341355	TRUE	NA
IBD1	JeukL4	ieu-a-31	M33515.metal.pos.txt.gz	44	0.149451	18.9793	0.691309	0.283511	0.0147529	0.38451	0.401975	0.338794	0.116078	1.21822	0.924542	42.8677	42	0.433791	43.1086	43	0.466667	0.00576332	0.0118643	0.629654	TRUE	4.31e-176
IBD1	uvC9oY	ieu-a-31	M31591.metal.pos.txt.gz	22	0.206767	19.5215	-0.166723	0.0733849	0.0230928	-0.112034	0.0824683	0.174302	-0.0840508	0.100758	0.414028	26.9112	20	0.13778	28.8002	21	0.11888	-0.00911798	0.0076954	0.249961	TRUE	1.12e-254
IBD1	IlEgl8	ieu-a-31	M15749.metal.pos.txt.gz	16	0.10133	19.5821	0.359534	0.159126	0.023857	0.258235	0.231847	0.265359	0.211762	0.284436	0.468889	9.58329	14	0.791972	9.97616	15	0.821237	0.00643717	0.01027	0.540883	TRUE	2.73e-92
IBD1	l0AyxD	ieu-a-31	M33131.metal.pos.txt.gz	13	0.12309	19.346	-0.402451	0.182817	0.0277089	-0.339211	0.236132	0.150852	-0.730438	0.713047	0.327651	5.67592	11	0.894089	5.90239	12	0.920922	0.0110572	0.023235	0.643465	TRUE	2.33e-66
IBD1	P13tRl	ieu-a-31	M36756.metal.pos.txt.gz	11	0.0872897	19.6289	0.463028	0.212343	0.0292155	0.516879	0.288791	0.0734854	0.691329	0.695108	0.345935	7.41412	9	0.594087	7.53309	10	0.674339	-0.00655858	0.0190144	0.738073	TRUE	1.13e-51
IBD1	IlEgl8	ieu-a-31	M17805.metal.pos.txt.gz	9	0.0339002	19.5311	0.649757	0.312311	0.0374816	0.474372	0.448848	0.290573	0.00522147	0.995897	0.995963	1.89071	7	0.965641	2.35525	8	0.968139	0.0147058	0.0215763	0.517417	TRUE	2.61e-38
IBD1	rYKnET	ieu-a-31	M01444.metal.pos.txt.gz	16	0.0835924	19.1875	-0.414307	0.204391	0.0426592	-0.362724	0.289341	0.209981	0.190523	0.492407	0.704632	13.0837	14	0.519946	14.9065	15	0.458174	-0.0176874	0.0131006	0.198403	TRUE	5.19e-85
IBD1	IlEgl8	ieu-a-31	M37459.metal.pos.txt.gz	3	0.0441918	19.7914	-0.385036	0.190041	0.042758	-0.471244	0.232624	0.0427883	-0.0246904	0.678788	0.976854	0.711236	1	0.399034	1.01702	2	0.60139	-0.0572763	0.103577	0.678425	TRUE	1.07e-13
IBD1	Tj5sjb	ieu-a-31	M20675.metal.pos.txt.gz	30	0.14667	19.0949	0.389376	0.193244	0.0439109	0.354764	0.28266	0.209447	0.717459	0.472671	0.140255	27.5329	28	0.489391	28.1114	29	0.511962	-0.0068206	0.00896771	0.45327	TRUE	1.04e-180
IBD1	l0AyxD	ieu-a-31	M36776.metal.pos.txt.gz	16	0.0476332	19.4584	-0.818921	0.411067	0.0463507	-0.533286	0.55052	0.332697	-1.50955	1.33576	0.277423	16.2175	14	0.300272	16.5613	15	0.345756	0.0107189	0.0196747	0.594461	TRUE	1.67e-52
IBD2	l0AyxD	ebi-a-GCST004131	M33515.metal.pos.txt.gz	43	0.142563	18.9793	0.722915	0.24106	0.00270952	0.555264	0.309205	0.0725291	1.07582	1.03889	0.306486	53.0813	41	0.0978475	53.2394	42	0.114549	-0.00349895	0.0100132	0.728552	TRUE	1.28e-183
IBD2	LWviY7	ebi-a-GCST004131	M33173.metal.pos.txt.gz	36	7.52325	19.0219	-0.0228978	0.00844341	0.00668953	-0.0239392	0.0121607	0.0490023	-0.0299695	0.0157785	0.066025	25.3179	34	0.859028	25.5993	35	0.877369	0.00509039	0.00959488	0.599192	TRUE	NA
IBD2	KkV310	ebi-a-GCST004131	M33420.metal.pos.txt.gz	11	0.074673	19.5174	-0.340379	0.126716	0.00722803	-0.348396	0.170437	0.0409406	-0.551073	0.263615	0.066135	4.19121	9	0.898383	5.02196	10	0.889706	0.00921171	0.0101066	0.385817	TRUE	2.5e-72
IBD2	zFDXMQ	ebi-a-GCST004131	M35669.metal.pos.txt.gz	15	0.167118	19.758	-0.247596	0.092675	0.00754769	-0.318346	0.116953	0.00648863	-0.35874	0.155004	0.0376396	14.9732	13	0.309029	15.9021	14	0.31939	0.00718713	0.00800314	0.385496	TRUE	2.79e-173
IBD2	LWviY7	ebi-a-GCST004131	M33131.metal.pos.txt.gz	10	0.0826882	19.346	-0.433556	0.162521	0.00763744	-0.432958	0.221837	0.0509745	-0.701388	0.658997	0.318247	6.53546	8	0.587477	6.71134	9	0.667144	0.00867862	0.0206941	0.685975	TRUE	9.57e-46
IBD2	ir79GV	ebi-a-GCST004131	M35186.metal.pos.txt.gz	23	0.0854142	19.42	-0.539105	0.202701	0.00782303	-0.870999	0.288808	0.0025627	-1.66886	0.626762	0.0145641	20.0335	21	0.519138	23.6331	22	0.366749	0.0180749	0.00952683	0.0716301	TRUE	5.77e-109
IBD2	hgfJiA	ebi-a-GCST004131	M20675.metal.pos.txt.gz	24	0.128837	19.0949	0.407575	0.159711	0.0107122	0.377015	0.223371	0.0914424	0.447572	0.388227	0.261339	25.1495	22	0.28998	25.1642	23	0.341874	-0.000874473	0.00770092	0.910621	TRUE	7.23e-173
IBD2	ROdtaS	ebi-a-GCST004131	M35189.metal.pos.txt.gz	15	0.153025	19.7238	0.220077	0.089906	0.0143708	0.311941	0.115095	0.0067226	0.300825	0.164263	0.0900536	12.653	13	0.474957	12.998	14	0.52668	-0.0045499	0.00774629	0.567021	TRUE	5.49e-194
IBD2	0dekSg	ebi-a-GCST004131	M18349.metal.pos.txt.gz	17	0.0799742	19.4196	-0.528005	0.223951	0.0183894	-0.637269	0.310893	0.0403835	-0.47694	0.535059	0.386802	18.6424	15	0.230396	18.6564	16	0.286885	-0.00104303	0.00985568	0.91712	TRUE	1.51e-92
IBD2	Tj5sjb	ebi-a-GCST004131	M01444.metal.pos.txt.gz	11	0.0566769	19.1875	-0.438903	0.193127	0.0230496	-0.247675	0.2638	0.347795	-0.434082	0.651819	0.522141	9.3381	9	0.406668	9.33817	10	0.500339	-0.000122866	0.015837	0.993979	TRUE	1.61e-61
IBD2	l0AyxD	ebi-a-GCST004131	M17805.metal.pos.txt.gz	8	0.0311447	19.5311	0.610348	0.271646	0.0246498	0.460293	0.351561	0.190439	1.08321	0.917815	0.282583	8.34684	6	0.213778	8.75596	7	0.270655	-0.0105099	0.0193802	0.60715	TRUE	2.81e-36
IBD2	BCa5Gq	ebi-a-GCST004131	M32762.metal.pos.txt.gz	13	0.132942	19.5826	0.181658	0.0820787	0.0268827	0.138574	0.111586	0.214289	0.0713281	0.298942	0.815801	12.6166	11	0.319124	12.7866	12	0.384742	0.00639237	0.0166027	0.707563	TRUE	1.19e-70
IBD2	suoHTa	ebi-a-GCST004131	M31591.metal.pos.txt.gz	20	0.200961	19.5215	-0.123579	0.0586883	0.0352313	-0.0916112	0.0625149	0.142803	-0.0780015	0.0810751	0.348753	28.9557	18	0.0489237	30.0444	19	0.0512358	-0.00516508	0.00627827	0.421449	TRUE	3.42e-269
IBD2	4hHSho	ebi-a-GCST004131	M01110.metal.pos.txt.gz	19	0.0753908	19.7477	-0.625445	0.297724	0.0356627	-0.39984	0.390517	0.305895	-0.421074	0.665851	0.535549	25.1089	17	0.0922992	25.285	18	0.117264	-0.0032454	0.00939678	0.73405	TRUE	1.13e-89
IBD2	JeukL4	ebi-a-GCST004131	M32980.metal.pos.txt.gz	10	0.0659101	19.7962	-0.519271	0.252548	0.0397705	-0.0497768	0.308128	0.871663	-0.253563	0.698361	0.725949	15.289	8	0.0537639	15.6122	9	0.0754346	-0.00798516	0.0194167	0.691685	TRUE	1.94e-68
IBD2	zFDXMQ	ebi-a-GCST004131	M35678.metal.pos.txt.gz	21	0.111945	19.747	-0.240234	0.119328	0.0440906	-0.328634	0.150512	0.0290039	-0.488962	0.247245	0.0626591	25.228	19	0.153173	26.9717	20	0.136063	0.00941726	0.00821787	0.266045	TRUE	1.73e-135
SLE1	8yBPAM	ebi-a-GCST003156	M33178.metal.pos.txt.gz	376	143.618	17.9923	-0.0565953	0.0137803	4.00876e-05	-0.0588138	0.0199522	0.00320107	-0.0818242	0.0392042	0.0375532	445.202	374	0.00659812	445.765	375	0.00692284	0.00763124	0.0111007	0.492222	TRUE	NA
SLE1	BTlu8z	ebi-a-GCST003156	M33447.metal.pos.txt.gz	7	0.041605	19.3547	1.62065	0.466454	0.000511987	1.66908	0.612371	0.0064185	2.45478	0.96	0.0508274	2.07852	5	0.838178	3.06681	6	0.800416	-0.0282529	0.0284197	0.365804	TRUE	6.99447e-29
SLE1	KH0d8y	ebi-a-GCST003156	M20675.metal.pos.txt.gz	24	0.128837	19.0949	1.26625	0.405391	0.00178702	1.62046	0.529944	0.00222975	2.06769	0.970742	0.0446	29.7554	22	0.124531	30.8739	23	0.125923	-0.0171571	0.0188674	0.373019	TRUE	2.33734e-107
SLE1	RHRkSr	ebi-a-GCST003156	M01605.metal.pos.txt.gz	8	0.0524197	19.7454	0.74187	0.254292	0.00352975	0.693502	0.345792	0.0449044	0.575476	0.486612	0.281695	3.22749	6	0.7798	3.38834	7	0.846907	0.00899067	0.0224171	0.702266	TRUE	2.3426e-32
SLE1	hgfJiA	ebi-a-GCST003156	M33441.metal.pos.txt.gz	6	0.0314983	20.7593	1.51386	0.564986	0.00737401	1.21132	0.762964	0.112365	0.0926616	1.75355	0.960391	3.51872	4	0.475038	4.25166	5	0.513781	0.0369444	0.0431532	0.440186	TRUE	8.29276e-24
SLE1	KH0d8y	ebi-a-GCST003156	M12261.metal.pos.txt.gz	9	0.132675	19.5544	0.465106	0.180513	0.00997848	0.551607	0.238096	0.0205179	0.74429	0.49952	0.179838	6.10217	7	0.527872	6.46146	8	0.595686	-0.0222808	0.0371711	0.567785	TRUE	7.25248e-38
SLE1	KeMwuf	ebi-a-GCST003156	M33228.metal.pos.txt.gz	17	0.110561	18.8722	1.00049	0.399787	0.01233	1.27156	0.50512	0.0118241	1.94601	0.738311	0.0187162	13.4949	15	0.564131	15.8153	16	0.465922	-0.0223961	0.0147023	0.148485	TRUE	1.62883e-97
SLE1	0dekSg	ebi-a-GCST003156	M35628.metal.pos.txt.gz	7	0.0226273	19.6411	1.41571	0.624272	0.0233431	0.61581	0.871668	0.479894	7.43387	3.50938	0.087696	2.0982	5	0.835397	5.13511	6	0.526605	-0.111572	0.0640236	0.141856	TRUE	4.37999e-18
SLE1	0dekSg	ebi-a-GCST003156	M03147.metal.pos.txt.gz	5	0.02789	19.945	-1.77779	0.825105	0.0311916	-1.65643	1.11348	0.136853	-2.08105	1.88858	0.350971	2.475	3	0.479827	2.50686	4	0.643407	0.00896583	0.0502251	0.869695	TRUE	2.24548e-20
SLE2	KH0d8y	ieu-a-815	M32197.metal.pos.txt.gz	7	0.0245884	19.8999	4.18859	1.34714	0.00187568	4.7982	1.85399	0.00965248	12.5911	7.59749	0.158365	4.7284	5	0.449917	5.99124	6	0.424172	-0.119089	0.105973	0.312153	TRUE	5.0686e-05
SLE2	U8UYmj	ieu-a-815	M36098.metal.pos.txt.gz	4	0.0142411	20.0031	1.88921	0.660822	0.00425146	1.48813	0.854975	0.081761	1.48004	2.09835	0.553683	2.82479	2	0.243559	2.88724	3	0.409339	0.0232604	0.110616	0.852927	TRUE	0.00579411
SLE2	KH0d8y	ieu-a-815	M33443.metal.pos.txt.gz	7	0.0449975	20.021	-3.05114	1.1124	0.00609079	-2.72796	1.45575	0.0609403	-0.479026	4.30345	0.915699	6.0365	5	0.302683	6.50247	6	0.369314	-0.0524305	0.0843943	0.561654	TRUE	2.09083e-09
SLE2	QWFTcS	ieu-a-815	M27716.metal.pos.txt.gz	5	0.119646	19.8642	-0.854553	0.349034	0.0143519	-0.709253	0.283493	0.0123552	-0.440578	0.573996	0.498627	5.26325	3	0.153505	6.74621	4	0.149923	-0.0467506	0.0508497	0.425696	TRUE	3.2746e-37
SLE2	ueOd2F	ieu-a-815	M34878.metal.pos.txt.gz	4	0.0530094	19.404	-1.86222	0.785946	0.0178171	-2.06582	0.952999	0.0301811	-6.29477	3.00058	0.170815	1.4696	2	0.479601	3.77757	3	0.286506	0.166407	0.109536	0.268055	TRUE	8.24263e-10
SLE2	f2noEF	ieu-a-815	M33957.metal.pos.txt.gz	6	0.0177534	19.49	-3.83309	1.63459	0.019028	-3.27557	1.52478	0.0316962	-8.93096	6.11331	0.217836	10.1981	4	0.0372195	12.1152	5	0.0332424	0.133982	0.154508	0.434782	TRUE	0.0452013
SLE2	YpQ0GZ	ieu-a-815	M33228.metal.pos.txt.gz	12	0.0947787	18.8722	1.49953	0.682685	0.0280551	0.981522	0.826666	0.235099	0.557526	1.1976	0.651521	8.16148	10	0.613067	9.078	11	0.614692	0.0240796	0.0251524	0.360963	TRUE	3.74486e-31
SLE2	f2noEF	ieu-a-815	M34106.metal.pos.txt.gz	8	0.0890419	19.6801	-1.02791	0.482764	0.0332363	-1.26728	0.547885	0.0207201	-2.41773	0.96691	0.0464989	5.79998	6	0.445966	8.40719	7	0.29806	0.0708764	0.0438948	0.157506	TRUE	1.40908e-24
SLE2	Hv3jbF	ieu-a-815	M21047.metal.pos.txt.gz	12	0.0478128	19.641	-2.91116	1.37925	0.0347999	-3.88067	1.87146	0.0381158	-12.4795	5.26252	0.0391838	8.23776	10	0.605625	11.7704	11	0.381145	0.145314	0.0773139	0.089592	TRUE	7.93063e-12
SLE2	U8UYmj	ieu-a-815	M37058.metal.pos.txt.gz	25	0.149798	18.6204	2.07919	1.01602	0.0407162	2.48791	1.13162	0.0279113	3.07648	2.14911	0.165731	39.2553	23	0.0185981	39.7328	24	0.0228427	-0.013902	0.0262808	0.601888	TRUE	9.41051e-39
SLE2	d6QG7O	ieu-a-815	M18392.metal.pos.txt.gz	3	0.00923146	20.6211	-2.09405	1.03606	0.043262	-1.79479	1.21515	0.139674	-21.7217	35.6218	0.651397	2.04253	1	0.152955	2.66345	2	0.264021	0.612773	1.11139	0.679216	TRUE	0.0351149
SLE2	nxd1Nr	ieu-a-815	M00054.metal.pos.txt.gz	146	0.501793	18.9429	2.0264	1.01794	0.0465146	1.69181	1.28721	0.188738	0.532194	3.78086	0.888256	218.472	144	6.18484e-05	218.728	145	7.37426e-05	0.00745745	0.018169	0.682087	TRUE	1.12657e-175
CeD1	l0AyxD	ebi-a-GCST000612	M35628.metal.pos.txt.gz	4	0.0117392	19.6411	2.42219	0.868895	0.00530884	2.33986	1.0556	0.0266494	4.67865	9.94721	0.68441	1.2091	2	0.546319	1.26096	3	0.738424	-0.0396878	0.174288	0.84103	TRUE	2.90174e-09
CeD1	A7LkWw	ebi-a-GCST000612	M35189.metal.pos.txt.gz	11	0.13987	20.605	0.509055	0.197622	0.00999776	0.374325	0.223337	0.0937276	0.184062	0.349178	0.610849	9.00578	9	0.436741	10.2661	10	0.417466	0.0195416	0.0174124	0.290792	TRUE	1.52092e-126
CeD1	EnACSM	ebi-a-GCST000612	M19934.metal.pos.txt.gz	17	0.0719272	18.7727	1.75524	0.683378	0.0102148	2.63512	0.96115	0.0061135	4.54485	1.71033	0.017928	8.8416	15	0.885653	12.0073	16	0.743479	-0.0323046	0.0181565	0.095467	TRUE	2.68432e-60
CeD1	U8UYmj	ebi-a-GCST000612	M35669.metal.pos.txt.gz	6	0.0754615	19.758	0.701454	0.277676	0.0115316	0.80025	0.324109	0.0135461	0.800064	0.521267	0.199614	3.04452	4	0.550403	3.09449	5	0.685422	-0.00567931	0.0254075	0.834076	TRUE	4.63523e-61
CeD1	f2noEF	ebi-a-GCST000612	M35718.metal.pos.txt.gz	11	0.0521498	19.42	-1.37231	0.553116	0.0130993	-1.55326	0.765431	0.0424317	-2.96602	1.52567	0.0837605	7.64695	9	0.570078	8.90324	10	0.54131	0.0310996	0.0277467	0.291371	TRUE	1.70031e-43
CeD1	BTlu8z	ebi-a-GCST000612	M01299.metal.pos.txt.gz	20	0.0680717	19.9807	-2.0321	0.825918	0.0138777	-1.8372	1.13345	0.105039	-1.82782	3.77964	0.634503	20.0882	18	0.327875	20.0917	19	0.389082	-0.00195562	0.0352597	0.95638	TRUE	6.16782e-56
CeD1	UQpxmD	ebi-a-GCST000612	M15500.metal.pos.txt.gz	148	0.539041	19.2571	1.18413	0.494559	0.0166517	1.66939	0.852617	0.0502353	1.87706	1.5116	0.216311	169.892	146	0.0858149	170.166	147	0.0926842	-0.00360118	0.00742105	0.628215	TRUE	0
CeD1	Nulzox	ebi-a-GCST000612	M27513.metal.pos.txt.gz	11	0.0334054	19.4876	1.82178	0.762817	0.0169298	1.28324	0.83517	0.124415	2.58672	3.58678	0.489107	17.1457	9	0.0464822	17.2369	10	0.0692829	-0.0123716	0.0565415	0.831683	TRUE	4.10149e-23
CeD1	A7LkWw	ebi-a-GCST000612	M32497.metal.pos.txt.gz	20	0.0847796	19.42	-0.48564	0.222249	0.0288804	-0.440992	0.30059	0.142352	-0.28872	0.297238	0.344251	11.9256	18	0.851054	12.921	19	0.842588	-0.00903197	0.0090527	0.331644	TRUE	3.24374e-72
CeD1	cCWRfz	ebi-a-GCST000612	M00584.metal.pos.txt.gz	9	0.0739378	19.4584	-1.2379	0.61346	0.043601	-0.913256	0.559925	0.102884	-0.43184	1.23224	0.736309	11.7486	7	0.109134	12.7213	8	0.121807	-0.0215221	0.0282721	0.471371	TRUE	3.66236e-62
CeD1	l0AyxD	ebi-a-GCST000612	M31453.metal.pos.txt.gz	5	0.0227415	19.5629	1.89778	0.951507	0.0460975	2.08168	1.25597	0.0974335	1.59346	4.51827	0.747659	4.31929	3	0.228987	4.32623	4	0.363652	0.00492795	0.0709722	0.949013	TRUE	1.99623e-17
CeD1	LWviY7	ebi-a-GCST000612	M34407.metal.pos.txt.gz	14	0.0746307	20.0782	-0.810708	0.409194	0.0475654	-0.962483	0.528488	0.0685764	-1.37357	1.07732	0.226445	14.7356	12	0.256213	15.131	13	0.299245	0.0114594	0.0201951	0.580881	TRUE	5.45974e-64
CeD1	rYKnET	ebi-a-GCST000612	M33228.metal.pos.txt.gz	11	0.0910937	18.8722	0.758959	0.383114	0.0475884	0.980208	0.442001	0.0265779	1.56905	0.664672	0.0425571	4.84127	9	0.84792	7.06573	10	0.719225	-0.0211197	0.0141604	0.170034	TRUE	6.39217e-86
CeD2	0dekSg	ieu-a-1060	M33961.metal.pos.txt.gz	7	0.0276582	19.6996	-2.01022	0.69377	0.00376114	-1.66705	0.924494	0.0713571	-1.12551	1.99895	0.597709	2.54038	5	0.770402	2.76308	6	0.83794	-0.0181663	0.0384945	0.656861	TRUE	3.88319e-19
CeD2	U8UYmj	ieu-a-1060	M35628.metal.pos.txt.gz	3	0.0082096	19.6411	2.66441	1.08144	0.0137485	3.06798	1.389	0.0271903	5.30058	10.309	0.697658	1.04615	1	0.306395	1.11536	2	0.572537	-0.0460896	0.179198	0.839735	TRUE	7.98022e-06
CeD2	QWFTcS	ieu-a-1060	M01361.metal.pos.txt.gz	7	0.0220296	20.1827	-2.12381	0.962711	0.0273788	-1.72252	1.23821	0.164184	-5.26996	3.55441	0.198271	3.17795	5	0.672573	4.02345	6	0.673503	0.0466466	0.0507299	0.400017	TRUE	3.78937e-16
CeD2	ueOd2F	ieu-a-1060	M31555.metal.pos.txt.gz	4	0.0300249	19.6235	0.894506	0.425018	0.0353234	1.05972	0.558022	0.0575563	1.31651	0.737112	0.216011	2.01096	2	0.365869	2.50601	3	0.474206	-0.0267023	0.0380547	0.555538	TRUE	6.42655e-18
CeD2	KH0d8y	ieu-a-1060	M33955.metal.pos.txt.gz	8	0.0251886	19.9953	-2.57831	1.24245	0.0379699	-2.63958	1.65019	0.109696	-3.32131	5.75201	0.584658	6.96942	6	0.323684	6.98991	7	0.429931	0.00757193	0.0570083	0.898677	TRUE	5.5033e-18
CeD2	d6QG7O	ieu-a-1060	M35669.metal.pos.txt.gz	3	0.0646185	19.758	0.616822	0.309192	0.0460488	0.652156	0.312128	0.0366725	1.73191	0.841644	0.287979	0.0678757	1	0.794455	2.08434	2	0.352689	-0.0839544	0.059122	0.390598	TRUE	1.09513e-48
CeD2	Zff3Nb	ieu-a-1060	M01508.metal.pos.txt.gz	9	0.0384806	18.7725	1.31966	0.664236	0.0469514	1.59389	0.918544	0.0826988	2.89298	1.9123	0.174086	4.15993	7	0.761183	4.9297	8	0.765063	-0.0293498	0.0334523	0.409388	TRUE	6.82072e-29
DM1	2Hjefc	finn-b-DERMATOPOLY_FG	M34400.metal.pos.txt.gz	12	0.0949238	19.3532	2.20796	0.913139	0.0156065	1.87213	1.21899	0.124585	2.00784	1.63844	0.24848	4.83709	10	0.901791	4.85873	11	0.937815	0.0105846	0.0719515	0.88597	TRUE	3.02508e-26
DM1	4EyPBw	finn-b-DERMATOPOLY_FG	M00569.metal.pos.txt.gz	12	0.0635716	19.8326	1.3152	0.550422	0.0168739	1.17427	0.700101	0.0934861	1.4678	1.85215	0.446472	13.1051	10	0.217854	13.115	11	0.285878	-0.0117523	0.135542	0.932617	TRUE	8.96435e-20
DM1	JeukL4	finn-b-DERMATOPOLY_FG	M03141.metal.pos.txt.gz	21	0.12798	19.1792	-3.84459	1.6244	0.0179434	-2.26837	2.32255	0.328733	-5.41439	3.72252	0.16213	12.6236	19	0.857271	12.8433	20	0.884007	0.0288981	0.0616586	0.644632	TRUE	8.6303e-41
DM1	QWFTcS	finn-b-DERMATOPOLY_FG	M01712.metal.pos.txt.gz	13	0.0769035	19.0361	3.6613	1.62395	0.0241604	4.52379	2.1199	0.0328455	2.05464	3.78544	0.598111	5.00659	11	0.930847	5.22736	12	0.94995	0.0380972	0.0810809	0.647627	TRUE	8.35315e-105
DM1	Q1dq9T	finn-b-DERMATOPOLY_FG	M19324.metal.pos.txt.gz	7	0.070957	19.8201	-2.92293	1.36913	0.032771	-1.62928	1.80212	0.365946	-1.77592	2.5222	0.512793	1.50324	5	0.912695	1.79646	6	0.937435	-0.0583011	0.107668	0.611415	TRUE	2.69427e-75
DM1	QWFTcS	finn-b-DERMATOPOLY_FG	M35626.metal.pos.txt.gz	6	0.0343622	19.4023	3.44843	1.66935	0.0388537	3.04246	2.1851	0.163812	2.44049	3.89148	0.564587	2.74714	4	0.600991	2.82936	5	0.726274	0.0316675	0.110442	0.788556	TRUE	6.23582e-76
DM1	Zff3Nb	finn-b-DERMATOPOLY_FG	M21049.metal.pos.txt.gz	15	0.265968	19.5927	-1.48429	0.720587	0.0394148	-1.36584	0.911651	0.13408	-1.7594	1.53371	0.271993	20.3476	13	0.0868751	20.4136	14	0.117631	0.0190641	0.092838	0.840481	TRUE	6.50551e-68
DM1	zFDXMQ	finn-b-DERMATOPOLY_FG	M22175.metal.pos.txt.gz	7	0.0609705	19.7754	-3.16124	1.58238	0.0457415	-3.05455	1.71436	0.0747908	-2.04532	4.41511	0.662647	9.12295	5	0.10426	9.26038	6	0.159456	-0.0442684	0.161301	0.794719	TRUE	2.19902e-24
DM2	rvw8QD	finn-b-M13_DERMATOPOLY	M00569.metal.pos.txt.gz	12	0.0635716	19.8326	1.39172	0.519338	0.0073669	1.20974	0.673861	0.0726159	1.87163	1.74086	0.307577	11.9975	10	0.285223	12.0985	11	0.356286	-0.0369592	0.127394	0.777653	TRUE	3.40039e-56
DM2	JeukL4	finn-b-M13_DERMATOPOLY	M03141.metal.pos.txt.gz	22	0.12798	19.1792	-4.28423	1.60091	0.00744797	-2.12543	2.17365	0.328164	-6.09343	3.76023	0.120788	21.075	20	0.392728	21.3753	21	0.436238	0.0332357	0.0622596	0.599347	TRUE	5.62232e-218
DM2	Q1dq9T	finn-b-M13_DERMATOPOLY	M19324.metal.pos.txt.gz	7	0.070957	19.8201	-3.13574	1.34662	0.01988	-3.16936	1.77358	0.0739397	-2.36251	2.48	0.384527	1.42821	5	0.921203	1.56606	6	0.954986	-0.0392999	0.105848	0.725637	TRUE	5.28278e-258
DM2	QWFTcS	finn-b-M13_DERMATOPOLY	M01712.metal.pos.txt.gz	13	0.0769035	19.0361	3.47014	1.59685	0.0297711	3.90131	2.10322	0.0636076	2.97685	3.7193	0.440435	5.96709	11	0.875551	5.98865	12	0.916653	0.0117052	0.0797063	0.885904	TRUE	NA
DM2	2Hjefc	finn-b-M13_DERMATOPOLY	M34400.metal.pos.txt.gz	12	0.0949238	19.3532	1.93799	0.896692	0.0306748	1.84507	1.19041	0.121156	1.78144	1.60814	0.293896	4.19494	10	0.938124	4.2087	11	0.96341	0.00828568	0.0706538	0.908967	TRUE	4.22068e-184
DM2	Zff3Nb	finn-b-M13_DERMATOPOLY	M32672.metal.pos.txt.gz	18	0.108146	19.2919	-1.8324	0.882971	0.0379616	-0.978613	1.30557	0.453515	-0.140263	2.27512	0.951605	16.336	16	0.429765	17.0034	17	0.454133	-0.0579524	0.0716785	0.430658	TRUE	3.17362e-217
DM2	BVFrYl	finn-b-M13_DERMATOPOLY	M18369.metal.pos.txt.gz	37	0.140509	19.4128	-3.58687	1.73319	0.0384979	-5.36429	2.65463	0.0433078	-8.09989	3.83644	0.0419593	27.5607	35	0.810589	29.2993	36	0.777818	0.0552784	0.0419225	0.195871	TRUE	4.27705e-106
RA1	UQpxmD	ukb-d-M13_RHEUMA	M35626.metal.pos.txt.gz	6	0.0343622	19.4023	0.00882088	0.00271536	0.00116013	0.00972203	0.00346532	0.00502355	0.012462	0.00652801	0.128893	0.653012	4	0.956995	1.02921	5	0.960176	-0.000108628	0.000177106	0.572807	TRUE	7.24433e-41
RA1	dtgsOw	ukb-d-M13_RHEUMA	M15122.metal.pos.txt.gz	18	0.0742082	19.0949	-0.00920084	0.00308606	0.00286913	-0.00677347	0.00394446	0.0859403	-0.000864365	0.00602049	0.887632	20.3763	16	0.203748	23.5938	17	0.130897	-0.000184462	0.000116051	0.131512	TRUE	6.77858e-105
RA1	niHtOH	ukb-d-M13_RHEUMA	M18476.metal.pos.txt.gz	9	0.0771144	20.051	-0.00300896	0.00115627	0.0092602	-0.00293287	0.00146728	0.0456244	-0.00464384	0.00149012	0.0169285	7.59524	7	0.369633	10.258	8	0.247382	0.000165502	0.000105647	0.161203	TRUE	1.05971e-70
RA1	U8UYmj	ukb-d-M13_RHEUMA	M35160.metal.pos.txt.gz	12	0.0464518	19.608	0.00626195	0.0025279	0.0132441	0.00625401	0.00330322	0.0583172	0.00911572	0.00740317	0.246373	4.30997	10	0.932282	4.47818	11	0.95379	-6.64218e-05	0.000161953	0.690359	TRUE	3.32765e-68
RA1	JeukL4	ukb-d-M13_RHEUMA	M32492.metal.pos.txt.gz	45	0.162671	18.7727	0.00586394	0.0023838	0.013897	0.00350561	0.00373857	0.348404	0.00519725	0.0054215	0.343102	35.7617	43	0.775226	35.7805	44	0.806562	8.22735e-06	6.009e-05	0.891735	TRUE	5.28278e-258
RA1	l0AyxD	ukb-d-M13_RHEUMA	M34732.metal.pos.txt.gz	4	0.0207594	19.7472	0.015208	0.00628756	0.0155742	0.0135199	0.00667041	0.0426774	0.0212798	0.276668	0.945693	4.65358	2	0.0976086	4.6547	3	0.198899	-0.000101623	0.00462873	0.984477	TRUE	1.80055e-24
RA1	QWFTcS	ukb-d-M13_RHEUMA	M35186.metal.pos.txt.gz	26	0.116791	19.42	0.0055115	0.0023013	0.0166227	0.00573145	0.00344717	0.0963816	0.00929931	0.00621212	0.14744	29.6494	24	0.196645	30.1837	25	0.217484	-6.90469e-05	0.000104988	0.517011	TRUE	4.22068e-184
RA1	LWviY7	ukb-d-M13_RHEUMA	M36808.metal.pos.txt.gz	35	0.150623	19.2568	-0.00721461	0.00320832	0.0245302	-0.012923	0.00475381	0.0065588	-0.0158119	0.00775347	0.04949	27.8326	33	0.722196	29.3161	34	0.696545	0.000101055	8.29675e-05	0.23186	TRUE	3.17362e-217
RA1	BTlu8z	ukb-d-M13_RHEUMA	M21044.metal.pos.txt.gz	18	0.0733622	19.2654	0.00497389	0.0022923	0.0300201	0.00608407	0.00319001	0.0564918	0.00296411	0.0052842	0.582611	12.7264	16	0.692647	12.9046	17	0.742549	4.45829e-05	0.000105615	0.678551	TRUE	4.27705e-106
RA1	hdXSYB	ukb-d-M13_RHEUMA	M33969.metal.pos.txt.gz	11	0.0547626	19.5535	0.00416778	0.00206833	0.0439004	0.00516981	0.00267924	0.053659	0.00525109	0.00576138	0.385831	4.50175	9	0.875404	4.54233	10	0.919584	-3.23738e-05	0.000160697	0.844819	TRUE	1.20794e-75
RA1	2Hjefc	ukb-d-M13_RHEUMA	M22116.metal.pos.txt.gz	13	0.0517307	19.8999	0.00737003	0.00366054	0.0440755	0.00670944	0.00484772	0.166346	0.00744468	0.0126971	0.569492	1.92672	11	0.998737	1.92676	12	0.99951	-1.17148e-06	0.000190813	0.995211	TRUE	1.10803e-76
RA1	2Hjefc	ukb-d-M13_RHEUMA	M17945.metal.pos.txt.gz	35	0.107712	19.0779	0.0056583	0.00285809	0.0477316	0.0059531	0.00395339	0.132113	0.0100746	0.00709018	0.16472	33.458	33	0.445039	33.929	34	0.47116	-5.0397e-05	7.39456e-05	0.500284	TRUE	4.34435e-170
RA2	UQpxmD	ukb-d-M06	M35626.metal.pos.txt.gz	6	0.0343622	19.4023	0.00882129	0.00260804	0.000718704	0.00955468	0.00326837	0.00346256	0.0110826	0.00627	0.151871	0.573562	4	0.965956	0.730847	5	0.981233	-6.74625e-05	0.000170105	0.711916	TRUE	8.33959e-41
RA2	kUizHr	ukb-d-M06	M15122.metal.pos.txt.gz	18	0.0742082	19.0949	-0.00856233	0.00306392	0.00519698	-0.00677752	0.00372017	0.0684805	-0.000214544	0.00596916	0.971773	21.7128	16	0.152708	25.2101	17	0.0901043	-0.000184712	0.000115061	0.127973	TRUE	8.35315e-105
RA2	hdXSYB	ukb-d-M06	M33969.metal.pos.txt.gz	11	0.0547626	19.5535	0.00531444	0.00198658	0.00746924	0.00641121	0.00257786	0.0128815	0.00605969	0.00553366	0.301929	3.77947	9	0.925318	3.80029	10	0.955907	-2.22711e-05	0.000154345	0.888447	TRUE	3.00427e-75
RA2	2Hjefc	ukb-d-M06	M22116.metal.pos.txt.gz	13	0.0517307	19.8999	0.00937841	0.00351586	0.00764274	0.00996146	0.00474191	0.0356649	0.00518114	0.0121953	0.679139	3.65628	11	0.978916	3.78547	12	0.987004	6.58738e-05	0.000183272	0.726076	TRUE	9.51822e-76
RA2	U8UYmj	ukb-d-M06	M35160.metal.pos.txt.gz	12	0.0464518	19.608	0.00621007	0.00242798	0.0105364	0.00639912	0.00311416	0.0398943	0.00833038	0.00711057	0.268535	2.99169	10	0.981619	3.09235	11	0.989448	-4.93504e-05	0.000155552	0.757571	TRUE	2.30551e-68
RA2	l0AyxD	ukb-d-M06	M34732.metal.pos.txt.gz	4	0.0207594	19.7472	0.0153836	0.00617469	0.0127241	0.0152893	0.00651231	0.0188874	-0.022042	0.270442	0.942464	4.81999	2	0.0898156	4.86618	3	0.181862	0.000626383	0.00452457	0.902574	TRUE	2.19902e-24
RA2	JeukL4	ukb-d-M06	M32492.metal.pos.txt.gz	45	0.162671	18.7727	0.00515675	0.00228958	0.0243051	0.00317368	0.00353483	0.369275	0.00453152	0.00520722	0.389003	35.4573	43	0.786222	35.4752	44	0.816672	7.7157e-06	5.77149e-05	0.894274	TRUE	3.30039e-258
RA2	LWviY7	ukb-d-M06	M36808.metal.pos.txt.gz	35	0.150623	19.2568	-0.00690616	0.00308151	0.0250154	-0.0108821	0.00440817	0.0135638	-0.0127153	0.00744701	0.0971351	23.8727	33	0.877713	24.6069	34	0.881401	6.82814e-05	7.96882e-05	0.397703	TRUE	5.62232e-218
RA2	BTlu8z	ukb-d-M06	M21044.metal.pos.txt.gz	18	0.0733622	19.2654	0.0048416	0.00220169	0.0278756	0.00594582	0.00309338	0.0545921	0.00199494	0.00507534	0.699459	14.2409	16	0.580773	14.6284	17	0.622228	6.31473e-05	0.000101441	0.542381	TRUE	8.05636e-106
RA2	niHtOH	ukb-d-M06	M18476.metal.pos.txt.gz	9	0.0771144	20.051	-0.00255706	0.00117711	0.0298312	-0.00261834	0.00142002	0.065202	-0.0043737	0.0014652	0.0203683	7.96006	7	0.336129	11.524	8	0.173739	0.000183902	0.00010388	0.119978	TRUE	9.24804e-71
RA2	f2noEF	ukb-d-M06	M35628.metal.pos.txt.gz	10	0.0313308	19.4348	0.00620827	0.00288917	0.0316497	0.00846408	0.00385752	0.0282226	0.0184131	0.0172709	0.317477	4.76465	8	0.782409	5.27841	9	0.809395	-0.000229977	0.000320851	0.493905	TRUE	7.41467e-49
RA2	QWFTcS	ukb-d-M06	M35186.metal.pos.txt.gz	26	0.116791	19.42	0.00456445	0.00226798	0.0441609	0.00560489	0.00338891	0.09815	0.00890971	0.00610257	0.157259	31.0163	24	0.153313	31.7786	25	0.16452	-7.92086e-05	0.000103136	0.449978	TRUE	3.97414e-184
T1D1	8PfeNy	ebi-a-GCST010681	M27728.metal.pos.txt.gz	31	0.175593	19.0125	1.21832	0.294863	3.59892e-05	0.682941	0.405374	0.0920426	0.20387	0.559111	0.718032	30.5048	29	0.389134	35.1213	30	0.238253	0.0215021	0.0102638	0.0450219	TRUE	1.50021e-146
T1D1	2Hjefc	ebi-a-GCST010681	M32691.metal.pos.txt.gz	18	0.169003	19.4822	-0.499285	0.155006	0.00127717	-0.577789	0.20788	0.00544543	-0.635121	0.331157	0.0731536	8.83932	16	0.919883	9.05478	17	0.938528	0.00798917	0.0172116	0.648776	TRUE	2.43555e-82
T1D1	niHtOH	ebi-a-GCST010681	M37058.metal.pos.txt.gz	44	0.228785	18.6204	-1.08311	0.369997	0.00341862	-1.34087	0.548399	0.0144829	-2.00302	0.853826	0.0237751	52.6266	42	0.126027	54.4133	43	0.113792	0.0117895	0.00987297	0.239133	TRUE	2.94642e-245
T1D1	BTlu8z	ebi-a-GCST010681	M33877.metal.pos.txt.gz	31	3.22993	19.3462	0.101196	0.036046	0.00499392	0.0640444	0.0562205	0.254635	0.0251285	0.0620546	0.688492	24.6669	29	0.695413	26.9347	30	0.626697	0.023754	0.0157736	0.1429	TRUE	NA
T1D1	Aixb7V	ebi-a-GCST010681	M00054.metal.pos.txt.gz	191	0.651328	18.9429	-1.08558	0.40085	0.00676499	-0.799215	0.576434	0.1656	-0.963575	1.62876	0.554824	216.4	189	0.0837413	216.407	190	0.0917005	-0.000598044	0.00773686	0.938468	TRUE	0
T1D1	rYKnET	ebi-a-GCST010681	M35977.metal.pos.txt.gz	9	0.0567964	19.54	-0.997629	0.372826	0.00745386	-1.11434	0.481797	0.0207286	-0.83073	0.681434	0.262292	5.6541	7	0.580668	5.73971	8	0.676361	-0.00589053	0.0201316	0.77831	TRUE	9.215e-46
T1D1	RJd1Vh	ebi-a-GCST010681	M33178.metal.pos.txt.gz	485	188.84	17.9923	-0.0261162	0.00976857	0.00750656	-0.020374	0.0143796	0.156522	-0.0502789	0.027517	0.0682881	544.391	483	0.0275261	545.385	484	0.0276529	0.00735373	0.007829	0.34805	TRUE	NA
T1D1	8HBfzR	ebi-a-GCST010681	M00060.metal.pos.txt.gz	207	0.683323	17.6352	-1.05748	0.400606	0.00829785	-1.48511	0.628329	0.0180987	-1.36929	1.43825	0.342191	251.586	205	0.0146741	251.649	206	0.0164316	0.00152781	0.0067669	0.8216	TRUE	0
T1D1	KH0d8y	ebi-a-GCST010681	M01110.metal.pos.txt.gz	20	0.124569	19.7477	1.03176	0.407759	0.0113958	1.46862	0.464797	0.00157932	1.86539	0.665741	0.0117868	22.7388	18	0.200829	25.7825	19	0.136365	-0.0191563	0.0123412	0.138013	TRUE	1.91143e-128
T1D1	2Hjefc	ebi-a-GCST010681	M01649.metal.pos.txt.gz	6	0.0411254	21.0012	-2.66811	1.07001	0.0126479	-1.82812	1.41927	0.197721	-1.03461	1.50502	0.529591	1.58421	4	0.811627	3.96629	5	0.554279	-0.0264671	0.0171486	0.197608	TRUE	1.63301e-35
T1D1	JeukL4	ebi-a-GCST010681	M19934.metal.pos.txt.gz	39	0.183121	18.7727	-0.988093	0.397169	0.0128522	-0.485964	0.516072	0.346367	0.0453034	0.745798	0.951889	48.879	37	0.0915061	52.3625	38	0.0604829	-0.0157822	0.00971901	0.112897	TRUE	2.90479e-188
T1D1	Q1dq9T	ebi-a-GCST010681	M32634.metal.pos.txt.gz	43	0.161116	19.2571	0.920904	0.390322	0.0183073	1.08731	0.590688	0.0656574	-0.605344	0.85637	0.483644	41.6023	41	0.444406	45.6018	42	0.324697	0.0191004	0.0096207	0.0538229	TRUE	2.8694e-171
T1D1	rYKnET	ebi-a-GCST010681	M01493.metal.pos.txt.gz	11	0.0431797	19.3547	-1.52988	0.657521	0.0199787	-1.72184	0.864516	0.0464057	0.574077	1.98244	0.778697	10.1707	9	0.336841	11.5964	10	0.312972	-0.0333917	0.0297289	0.290416	TRUE	3.03759e-41
T1D1	1Chosv	ebi-a-GCST010681	M33821.metal.pos.txt.gz	19	0.0907015	19.3547	-0.764969	0.33083	0.0207625	-0.76786	0.469243	0.10176	-0.640934	0.901917	0.486946	24.4675	17	0.10728	24.4992	18	0.139344	-0.00327714	0.0220694	0.883701	TRUE	1.53904e-86
T1D1	2Hjefc	ebi-a-GCST010681	M35327.metal.pos.txt.gz	20	0.0745832	19.6857	1.55072	0.674656	0.0215311	2.40716	0.962863	0.0124191	0.173242	1.98997	0.931587	16.8515	18	0.53334	17.3928	19	0.563273	0.0144623	0.0196555	0.47134	TRUE	1.24079e-72
T1D1	pO1Xhi	ebi-a-GCST010681	M32425.metal.pos.txt.gz	22	0.0743307	19.3547	0.459087	0.20266	0.0234936	0.291627	0.296113	0.324697	1.06909	0.545289	0.0640037	18.4345	20	0.558806	19.8866	21	0.528457	-0.0202625	0.0168154	0.24227	TRUE	3.76386e-77
T1D1	KtPQl6	ebi-a-GCST010681	M32672.metal.pos.txt.gz	18	0.108146	19.2919	0.488993	0.21711	0.0243047	0.600156	0.29695	0.0432723	0.692225	0.563501	0.237048	10.8636	16	0.817824	11.0164	17	0.855712	-0.00693629	0.0177475	0.701076	TRUE	1.4423e-111
T1D1	yZ3s8R	ebi-a-GCST010681	M10642.metal.pos.txt.gz	32	0.125722	18.9429	-1.2136	0.541643	0.0250528	-0.70478	0.690367	0.307313	-0.145519	1.21577	0.905524	39.4907	30	0.115111	40.7586	31	0.112808	-0.012702	0.0129423	0.334229	TRUE	3.35067e-124
T1D1	BTlu8z	ebi-a-GCST010681	M36009.metal.pos.txt.gz	14	0.136561	19.6396	-0.642132	0.289978	0.0268002	-0.813229	0.332244	0.0143777	-0.109386	0.978422	0.912832	19.383	12	0.0796948	19.9108	13	0.0974571	-0.0210337	0.0367971	0.578133	TRUE	4.23381e-63
T1D1	LWviY7	ebi-a-GCST010681	M36808.metal.pos.txt.gz	35	0.150623	19.2568	-1.05699	0.478404	0.027146	-0.727912	0.72126	0.312868	-1.13718	1.13286	0.322771	25.4443	33	0.823421	25.4504	34	0.854612	0.000954395	0.0122217	0.938228	TRUE	2.14776e-155
T1D1	LWviY7	ebi-a-GCST010681	M34533.metal.pos.txt.gz	16	0.10424	19.3929	0.417044	0.193694	0.0313106	0.530682	0.269087	0.0485918	0.392068	0.369551	0.306682	18.7713	14	0.173872	18.78	15	0.223877	0.0014137	0.0175733	0.937022	TRUE	3.89822e-89
T1D1	Cmc17P	ebi-a-GCST010681	M37190.metal.pos.txt.gz	18	0.121784	19.6431	0.267706	0.132437	0.0432409	0.34514	0.180685	0.0561104	0.40351	0.226982	0.0944588	18.8376	16	0.277175	19.4857	17	0.301377	-0.010135	0.0136603	0.468882	TRUE	1.02016e-119
T1D2	LADxET	finn-b-T1D_STRICT	M32867.metal.pos.txt.gz	21	0.0943578	18.5511	3.0259	1.11929	0.0068634	2.48415	1.49365	0.0962836	7.0112	4.68617	0.151042	16.8185	19	0.60216	17.5855	20	0.61469	-0.0298405	0.0340727	0.392083	TRUE	2.03e-20
T1D2	axmcmg	finn-b-T1D_STRICT	M33190.metal.pos.txt.gz	21	0.221496	19.6437	0.306254	0.116245	0.0084248	0.285649	0.159876	0.0739876	0.287488	0.287531	0.329948	12.6141	19	0.857726	12.6192	20	0.893118	0.00159682	0.0223774	0.943858	TRUE	1.68e-33
T1D2	rmj0kJ	finn-b-T1D_STRICT	M00054.metal.pos.txt.gz	192	0.652093	18.9429	1.26214	0.503008	0.0121011	0.389943	0.842291	0.643396	0.78649	1.5948	0.622469	207.782	190	0.17901	207.89	191	0.191111	0.00246919	0.00785431	0.753582	TRUE	6.32e-21
T1D2	Y6Ufkh	finn-b-T1D_STRICT	M33835.metal.pos.txt.gz	9	0.189194	19.8904	-0.488004	0.199918	0.0146457	-0.220012	0.281752	0.434879	-0.414809	0.535375	0.46382	4.93316	7	0.668119	4.95489	8	0.762387	-0.00472942	0.0320904	0.886989	TRUE	3.02e-235
T1D2	JWpkx3	finn-b-T1D_STRICT	M33173.metal.pos.txt.gz	47	10.1623	19.0219	-0.0389971	0.0161191	0.0155496	-0.0528096	0.0246275	0.0320059	-0.019528	0.0332089	0.559448	50.1107	45	0.277837	50.6133	46	0.2964	-0.0136878	0.0203749	0.505146	TRUE	0
T1D2	eYOaoc	finn-b-T1D_STRICT	M36376.metal.pos.txt.gz	5	0.0512397	20.3556	0.944091	0.395169	0.0168905	0.826615	0.52338	0.114249	-1.50181	2.12993	0.531563	2.34436	3	0.504076	3.71007	4	0.446663	0.0990141	0.0847262	0.326967	TRUE	2.03e-66
T1D2	M8wKiB	finn-b-T1D_STRICT	M33389.metal.pos.txt.gz	56	0.170739	18.6209	-1.14331	0.491556	0.0200237	-0.937873	0.680009	0.167831	-2.09568	2.42708	0.391706	39.3457	54	0.932789	39.5062	55	0.942859	0.00920598	0.022975	0.690226	TRUE	5.23e-53
T1D2	v6hxdO	finn-b-T1D_STRICT	M01515.metal.pos.txt.gz	18	0.399485	19.7973	0.105062	0.0451999	0.0201047	0.0481626	0.0605383	0.42628	0.101567	0.064836	0.136788	18.5641	16	0.291913	18.5711	17	0.3537	0.00138823	0.017913	0.939188	TRUE	8.36e-10
T1D2	TnYcvl	finn-b-T1D_STRICT	M18474.metal.pos.txt.gz	13	0.666929	19.4008	-0.20241	0.0876803	0.0209714	-0.322753	0.120115	0.00720874	-0.303608	0.130239	0.0397874	11.0623	11	0.438062	12.1654	12	0.432487	0.0199512	0.0190491	0.317405	TRUE	0.0325
T1D2	XMCDkU	finn-b-T1D_STRICT	M22189.metal.pos.txt.gz	9	0.0344225	19.1997	1.32844	0.577371	0.0214004	1.08142	0.779823	0.16552	0.84043	1.34394	0.551576	5.45693	7	0.604384	5.61863	8	0.689864	0.0129584	0.0322253	0.699591	TRUE	3.33e-23
T1D2	XUypVk	finn-b-T1D_STRICT	M32452.metal.pos.txt.gz	37	0.175622	19.5404	0.995551	0.438571	0.0232082	0.476995	0.691621	0.490397	0.361956	0.954162	0.706724	36.0982	35	0.417029	36.6767	36	0.437304	0.0101834	0.0135972	0.458901	TRUE	1.36e-46
T1D2	Rzbkxt	finn-b-T1D_STRICT	M33751.metal.pos.txt.gz	28	2.82594	19.2244	0.0955098	0.0423379	0.0240772	0.0239369	0.0594973	0.687449	0.0941545	0.0559782	0.104546	24.5645	26	0.543719	24.5659	27	0.598775	0.0004734	0.0127915	0.97076	TRUE	5.63e-16
T1D2	cfkkXS	finn-b-T1D_STRICT	M36738.metal.pos.txt.gz	10	0.300979	20.1446	-0.585874	0.265169	0.0271445	-0.615665	0.36509	0.0917313	-0.240257	0.654232	0.722968	6.43527	8	0.598597	6.7692	9	0.661134	-0.0195469	0.0338256	0.579247	TRUE	9.21e-86
T1D2	K2xqDk	finn-b-T1D_STRICT	M02137.metal.pos.txt.gz	19	0.260643	19.7737	0.451586	0.207129	0.0292411	0.386951	0.254891	0.128989	0.427407	0.349295	0.237783	14.965	17	0.598002	14.9724	18	0.663861	0.00129548	0.0150688	0.932494	TRUE	1.02e-56
T1D2	3LqiON	finn-b-T1D_STRICT	M00064.metal.pos.txt.gz	5	0.0367229	20.032	4.85422	2.23657	0.0299775	5.5573	2.80177	0.0473118	0.319454	5.04017	0.953449	2.39166	3	0.49519	3.39965	4	0.4933	0.0426084	0.0424392	0.389357	TRUE	NA
T1D2	R859fG	finn-b-T1D_STRICT	M35126.metal.pos.txt.gz	16	0.0722276	19.6357	-0.643652	0.296758	0.0300865	-0.318508	0.383726	0.406515	-0.406081	0.513774	0.442485	20.4724	14	0.115939	20.9528	15	0.138343	-0.0114987	0.02006	0.575591	TRUE	2.36e-112
T1D2	ER38Pe	finn-b-T1D_STRICT	M33627.metal.pos.txt.gz	11	0.0868885	19.9076	-1.33925	0.617788	0.0301725	-0.429289	0.771267	0.577799	1.14509	2.21253	0.617254	11.6383	9	0.234477	13.4013	10	0.202091	-0.055272	0.0473369	0.272957	TRUE	2.65e-89
T1D2	tZhlKw	finn-b-T1D_STRICT	M33204.metal.pos.txt.gz	13	0.123034	19.4745	1.15848	0.536091	0.030697	1.03765	0.681889	0.128078	0.295799	1.46452	0.843621	4.6436	11	0.947192	5.04428	12	0.956484	0.020716	0.0327272	0.539677	TRUE	9.63e-45
T1D2	cFOp1p	finn-b-T1D_STRICT	M33957.metal.pos.txt.gz	10	0.0389146	19.49	1.295	0.599532	0.0307712	1.26172	0.807747	0.118282	2.64524	2.28813	0.281007	10.5319	8	0.229657	11.0269	9	0.273872	-0.0363761	0.0593261	0.556799	TRUE	5.64e-58
T1D2	U7TorF	finn-b-T1D_STRICT	M27278.metal.pos.txt.gz	21	0.100041	19.5142	-1.08495	0.504417	0.0314844	-0.976169	0.761608	0.199941	-0.841118	1.16455	0.478927	19.7421	19	0.410247	19.7986	20	0.470588	-0.00509138	0.0218182	0.817982	TRUE	2.36e-46
T1D2	FXLKU7	finn-b-T1D_STRICT	M33833.metal.pos.txt.gz	8	0.0563637	19.5892	-1.03906	0.486185	0.0325846	-0.432402	0.643721	0.50176	-2.67629	1.60524	0.146518	8.56173	6	0.199768	10.1927	7	0.177911	0.0554934	0.0519059	0.32613	TRUE	5.23e-08
T1D2	GwEAzS	finn-b-T1D_STRICT	M33653.metal.pos.txt.gz	13	0.082264	19.4875	-0.634847	0.305918	0.0379662	-0.367547	0.433004	0.395976	0.0910102	0.693258	0.897925	4.64174	11	0.947269	6.00309	12	0.915926	-0.0277126	0.0237516	0.267976	TRUE	6.23e-56
T1D2	FhRtxm	finn-b-T1D_STRICT	M15488.metal.pos.txt.gz	18	0.0576012	18.9429	2.0313	0.994409	0.0410802	2.38898	1.35242	0.0773207	4.98945	3.39525	0.161076	13.6797	16	0.622562	14.51	17	0.630728	-0.0282933	0.0310499	0.375704	TRUE	1.36e-46
T1D2	SGMgDY	finn-b-T1D_STRICT	M02734.metal.pos.txt.gz	45	0.167704	19.2569	1.03851	0.510041	0.0417375	1.29825	0.717857	0.0705273	0.552797	1.64849	0.739002	25.985	43	0.981244	26.081	44	0.985471	0.00522817	0.0168735	0.758175	TRUE	5.32e-21
T1D2	7sVBnt	finn-b-T1D_STRICT	M12774.metal.pos.txt.gz	33	0.124731	19.2571	-1.12101	0.553457	0.0428195	-1.46755	0.741622	0.0478348	-2.19201	1.27475	0.0954834	37.5011	31	0.195583	38.5543	32	0.197291	0.0150219	0.016099	0.357981	TRUE	4.16e-56
T1D2	mmoh8g	finn-b-T1D_STRICT	M15140.metal.pos.txt.gz	43	0.178895	18.7727	1.037	0.512047	0.0428456	0.241964	0.696444	0.72827	0.30269	1.08492	0.78165	52.5292	41	0.107048	53.2864	42	0.113703	0.0100868	0.0131201	0.446416	TRUE	6.23e-45
T1D2	CXfGF6	finn-b-T1D_STRICT	M33144.metal.pos.txt.gz	8	0.0745688	19.5527	-0.413378	0.204353	0.0430871	-0.283191	0.259667	0.275452	0.11654	0.42781	0.794439	5.41788	6	0.491438	7.37624	7	0.390784	-0.0411369	0.0293957	0.211208	TRUE	5.23e-20
T1D2	x3ITOx	finn-b-T1D_STRICT	M33447.metal.pos.txt.gz	10	0.0498138	19.3547	1.06472	0.53957	0.0484649	1.34372	0.726989	0.0645545	1.72945	1.4579	0.269551	5.80138	8	0.669469	6.04227	9	0.73568	-0.017416	0.0354845	0.636743	TRUE	5.12e-22

## Sheet: supplementary table4
Supplementary Table 4. Detailed information of instrumental variables used in MR analyses
Traits	Metabolites	SNP	Effect allele	Other allele	Metabolites (exposure)			Traits (outcome)			R2	F
					BETA	SE	P	BETA	SE	P
CeD	1-oleoylglycerophosphoethanolamine	rs10468017	T	C	0.0164	0.0037	8.056e-06	0.0178399	0.0306285	0.557799	0.00268334	19.6411
CeD	1-oleoylglycerophosphoethanolamine	rs12918754	A	G	0.0163	0.0036	5.889e-06	0.0603871	0.0289257	0.0366404	0.0027997	20.4952
CeD	1-oleoylglycerophosphoethanolamine	rs7583683	A	G	0.021	0.0047	7.237e-06	0.0661398	0.041932	0.1151	0.00272656	19.9583
DM	betaine	rs1039293	A	G	0.0709	0.0153	3.393e-06	0.1428	0.0992	0.1498	0.0123806	21.4488
DM	betaine	rs10935899	C	G	-0.0506	0.011	4.539e-06	-0.1357	0.1245	0.2758	0.00290055	21.1542
DM	betaine	rs1397829	A	G	0.042	0.0085	7.076e-07	-0.1038	0.0991	0.2946	0.00334528	24.4085
DM	betaine	rs16902976	T	G	-0.1325	0.0294	6.361e-06	0.112	0.2684	0.6765	0.00278454	20.3057
DM	betaine	rs2446427	T	C	-0.0554	0.0122	5.211e-06	0.1015	0.1562	0.5161	0.00282681	20.6149
DM	betaine	rs2472297	T	C	-0.0668	0.0104	1.502e-10	-0.2809	0.1141	0.01385	0.00563971	41.2446
DM	betaine	rs2493277	C	G	0.0605	0.0127	1.914e-06	0.047	0.107	0.6604	0.00311012	22.6874
DM	betaine	rs384814	A	G	0.1452	0.0326	8.35e-06	0.0935	0.1864	0.616	0.00271983	19.8326
DM	betaine	rs6603123	T	G	0.0865	0.0193	7.84e-06	0.2176	0.0993	0.0284597	0.0115904	20.0637
DM	betaine	rs6968554	A	G	0.0644	0.0086	8.677e-14	0.0856	0.1041	0.4105	0.00765009	56.0603
DM	betaine	rs8096497	A	G	0.089	0.0163	4.836e-08	0.0002	0.1549	0.9989	0.00533249	29.8022
DM	betaine	rs946712	A	C	0.1039	0.0212	9.586e-07	0.5433	0.3106	0.0803101	0.0032912	24.0126
IBD	1-arachidonoylglycerophosphoethanolamine	rs10044369	T	C	0.0172	0.0201	0.3234	-0.0198966	0.0034	3.263e-07	0.00346978	25.5847
IBD	1-arachidonoylglycerophosphoethanolamine	rs1010377	T	C	0.0119	0.0185	0.2439	-0.0214995	0.0026	6.761e-06	0.002842	20.9425
IBD	1-arachidonoylglycerophosphoethanolamine	rs10468017	T	C	0.0171	0.0188	0.3488	-0.0176956	0.0027	1.287e-10	0.00542767	40.1002
IBD	1-arachidonoylglycerophosphoethanolamine	rs11048586	A	G	-0.0128	0.0193	0.4074	0.0160013	0.0027	1.854e-06	0.00304845	22.4685
IBD	1-arachidonoylglycerophosphoethanolamine	rs11081670	T	C	0.0121	0.018	0.9443	-0.00130085	0.0026	3.701e-06	0.00293805	21.6524
IBD	1-arachidonoylglycerophosphoethanolamine	rs1161762	T	C	0.0123	0.0188	0.0496798	0.0369007	0.0027	4.019e-06	0.0028156	20.7474
IBD	1-arachidonoylglycerophosphoethanolamine	rs17031728	C	G	-0.0181	0.0217	0.7982	0.00550482	0.0034	7.677e-08	0.00384097	28.3323
IBD	1-arachidonoylglycerophosphoethanolamine	rs17152841	T	C	-0.0119	0.0186	0.3155	0.018596	0.0026	5.932e-06	0.002842	20.9425
IBD	1-arachidonoylglycerophosphoethanolamine	rs174578	A	T	-0.0354	0.0177	0.000201002	0.0656005	0.0026	6.122e-42	0.0246011	185.328
IBD	1-arachidonoylglycerophosphoethanolamine	rs1984049	A	C	0.0307	0.0217	0.0276898	-0.0476998	0.0068	5.329e-06	0.0114484	20.3594
IBD	1-arachidonoylglycerophosphoethanolamine	rs2033371	A	G	-0.0119	0.0192	0.9193	0.0018982	0.0027	7.886e-06	0.00263592	19.42
IBD	1-arachidonoylglycerophosphoethanolamine	rs2070895	A	G	0.0176	0.0211	0.520701	-0.0135007	0.0033	1.284e-07	0.00385507	28.4367
IBD	1-arachidonoylglycerophosphoethanolamine	rs2072583	A	G	0.0186	0.0217	0.9442	0.00149888	0.0042	8.706e-06	0.00266123	19.6069
IBD	1-arachidonoylglycerophosphoethanolamine	rs2392820	A	G	0.0123	0.0188	0.641201	0.00880116	0.0027	3.862e-06	0.0028156	20.7474
IBD	1-arachidonoylglycerophosphoethanolamine	rs2504453	A	T	0.02	0.0275	0.6895	-0.0110003	0.0043	3.35e-06	0.00293467	21.6274
IBD	1-arachidonoylglycerophosphoethanolamine	rs35544	A	G	0.0158	0.023	0.3939	-0.0196008	0.0034	4.259e-06	0.00292951	21.5893
IBD	1-arachidonoylglycerophosphoethanolamine	rs381227	T	C	-0.0121	0.0187	0.2181	0.0230034	0.0027	6.304e-06	0.00272503	20.0782
IBD	1-arachidonoylglycerophosphoethanolamine	rs39741	A	G	-0.0199	0.0277	0.6311	0.0133011	0.0043	4.514e-06	0.00290548	21.4117
IBD	1-arachidonoylglycerophosphoethanolamine	rs4149056	T	C	-0.0294	0.0229	0.8194	0.00519647	0.0034	2.664e-18	0.0100706	74.7513
IBD	1-arachidonoylglycerophosphoethanolamine	rs4257232	A	G	0.012	0.0174	0.2846	0.018596	0.0026	4.168e-06	0.00288983	21.296
IBD	1-arachidonoylglycerophosphoethanolamine	rs4530945	T	C	-0.0117	0.0189	0.499401	0.0127978	0.0026	9.976e-06	0.00274753	20.2445
IBD	1-arachidonoylglycerophosphoethanolamine	rs6564097	T	C	0.0116	0.0177	0.7795	0.00489799	0.0026	9.667e-06	0.00270089	19.8999
IBD	1-arachidonoylglycerophosphoethanolamine	rs6722402	T	G	-0.0124	0.0186	0.9897	-0.00020002	0.0027	2.994e-06	0.00286144	21.0862
IBD	1-arachidonoylglycerophosphoethanolamine	rs7307046	A	G	0.0122	0.017	0.02357	-0.0385018	0.0026	2.329e-06	0.00298667	22.0118
IBD	1-arachidonoylglycerophosphoethanolamine	rs7599943	T	C	-0.012	0.0175	0.7898	0.00469894	0.0026	5.165e-06	0.00288983	21.296
IBD	1-arachidonoylglycerophosphoethanolamine	rs9624896	T	C	-0.0125	0.0182	0.6921	0.00720399	0.0027	2.402e-06	0.00290764	21.4276
IBD	arachidonate (20:4n6)	rs1010069	A	G	0.0081	0.017	0.938	-0.00130085	0.0018	8.583e-06	0.00274121	20.2445
IBD	arachidonate (20:4n7)	rs10241964	A	G	0.0182	0.0278	0.8653	-0.00470103	0.0035	2.247e-07	0.003657	27.0327
IBD	arachidonate (20:4n8)	rs10514491	T	C	0.012	0.0183	0.1251	0.0280042	0.0026	2.859e-06	0.00288318	21.296
IBD	arachidonate (20:4n9)	rs11837423	A	G	0.0385	0.0338	0.3108	-0.0343016	0.008	1.519e-06	0.0129447	23.1339
IBD	arachidonate (20:4n10)	rs12352829	A	G	-0.0134	0.0239	0.1053	0.0387975	0.0027	5.843e-07	0.00333228	24.6243
IBD	arachidonate (20:4n11)	rs12532113	T	C	-0.028	0.0485	0.612999	0.0244975	0.006	3.061e-06	0.00387314	21.77
IBD	arachidonate (20:4n12)	rs1430209	T	C	-0.0086	0.0167	0.276	-0.0182047	0.0018	1.865e-06	0.003089	22.821
IBD	arachidonate (20:4n13)	rs17099239	A	G	-0.012	0.0232	0.2619	0.0259991	0.0027	6.74e-06	0.00267412	19.7477
IBD	arachidonate (20:4n14)	rs174548	C	G	0.0488	0.0181	5.64105e-05	-0.0730977	0.0025	1.429e-84	0.0491777	380.927
IBD	arachidonate (20:4n15)	rs180022	T	C	0.0117	0.0231	0.83	-0.00500249	0.0026	9.431e-06	0.00274121	20.2445
IBD	arachidonate (20:4n16)	rs2275351	T	C	0.012	0.0233	0.1486	-0.0337016	0.0027	7.062e-06	0.00267412	19.7477
IBD	arachidonate (20:4n17)	rs3798211	A	C	-0.0083	0.0169	0.0344001	0.0356953	0.0018	4.584e-06	0.00287785	21.2566
IBD	arachidonate (20:4n18)	rs4739402	T	C	-0.0085	0.0167	0.0784603	0.0294034	0.0019	5.614e-06	0.00270933	20.0084
IBD	arachidonate (20:4n19)	rs4982495	T	C	-0.0084	0.0169	0.9458	0.0010994	0.0018	3.272e-06	0.00294741	21.7719
IBD	arachidonate (20:4n20)	rs6535974	A	G	-0.0122	0.0231	0.4703	-0.016597	0.0027	5.801e-06	0.00276375	20.4115
IBD	arachidonate (20:4n21)	rs6568389	T	C	0.0157	0.018	0.7296	0.00620074	0.0033	2.164e-06	0.00306301	22.6284
IBD	arachidonate (20:4n22)	rs712916	T	C	-0.0456	0.0636	0.749	-0.0203966	0.0102	8.193e-06	0.00270559	19.9807
IBD	arachidonate (20:4n23)	rs7169869	A	G	-0.0194	0.0167	0.0218801	0.0384031	0.0043	6.586e-06	0.0113946	20.3317
IBD	arachidonate (20:4n24)	rs8123073	A	G	-0.0372	0.062	0.6296	0.0298986	0.0082	5.942e-06	0.00278584	20.575
IBD	arachidonate (20:4n25)	rs9679675	A	C	0.0092	0.0169	0.0869	0.0288984	0.0018	4.167e-07	0.00353348	26.1164
RA	1-myristoylglycerophosphocholine	rs1493534	A	C	0.0219	0.000217196	0.567175	0.000124283	0.0048	4.966e-06	0.00281881	20.8108
RA	1-myristoylglycerophosphocholine	rs2490288	T	C	0.0163	0.000159939	0.78674	4.32713e-05	0.0037	8.062e-06	0.00262854	19.4023
RA	1-myristoylglycerophosphocholine	rs249619	T	C	-0.0319	0.000152491	0.0877445	-0.000260366	0.0072	8.87e-06	0.0109932	19.6076
RA	1-myristoylglycerophosphocholine	rs3813782	A	G	0.0535	0.000222344	0.0136399	0.000548437	0.0118	5.81e-06	0.0115061	20.533
RA	1-myristoylglycerophosphocholine	rs7710231	T	C	-0.0168	0.00017051	0.244799	-0.000198317	0.0038	9.634e-06	0.0026472	19.5404
RA	1-myristoylglycerophosphocholine	rs780093	T	C	0.019	0.000154628	0.233697	0.000184146	0.0036	1.329e-07	0.00376833	27.8474
RA	glycerol	rs10036528	A	G	-0.0209	0.00028678	0.392026	0.00024547	0.0043	9.578e-07	0.003203	23.6177
RA	glycerol	rs10216545	A	G	-0.0214	0.000151234	0.979195	3.94392e-06	0.0047	5.187e-06	0.0116618	20.708
RA	glycerol	rs10839972	T	G	0.0121	0.000194639	0.056508	-0.000371197	0.0027	7.908e-06	0.00272429	20.0782
RA	glycerol	rs12337470	T	C	-0.0123	0.000199175	0.258746	0.00022494	0.0027	5.898e-06	0.00281484	20.7474
RA	glycerol	rs13106354	A	T	-0.0127	0.000181608	0.000576687	0.000625162	0.0027	2.308e-06	0.00300033	22.1188
RA	glycerol	rs13216754	A	G	0.0555	0.000623221	0.449144	0.00047168	0.0105	1.311e-07	0.00378577	27.9312
RA	glycerol	rs1614303	T	G	0.0138	0.000194492	0.900617	-2.42887e-05	0.0027	2.401e-07	0.00354066	26.1164
RA	glycerol	rs2076799	C	G	0.0166	0.000294628	0.0117807	-0.000742066	0.0036	3.893e-06	0.00288371	21.2566
RA	glycerol	rs2259038	A	G	-0.0216	0.000374835	0.810918	-8.96761e-05	0.0048	7.514e-06	0.00274679	20.2445
RA	glycerol	rs2501242	T	G	-0.0136	0.000180041	0.366165	-0.000162699	0.0026	1.841e-07	0.00370777	27.3535
RA	glycerol	rs2941840	A	G	0.0221	0.000263089	0.842811	-5.21705e-05	0.0048	3.709e-06	0.00287505	21.1926
RA	glycerol	rs4436910	A	T	0.0118	0.00018978	0.0528421	-0.000367455	0.0027	9.126e-06	0.00259122	19.0949
RA	glycerol	rs5022234	A	C	0.0221	0.000160701	0.407677	-0.000133059	0.0047	2.149e-06	0.0124276	22.0848
RA	glycerol	rs5759809	T	C	0.069	0.00032109	0.078473	-0.000564996	0.015	4.225e-06	0.0037677	21.1524
RA	glycerol	rs641939	A	G	0.0127	0.000184956	0.18424	-0.000245588	0.0027	2.128e-06	0.00300033	22.1188
RA	glycerol	rs806214	A	G	0.0123	0.000184242	0.537704	-0.000113546	0.0026	2.939e-06	0.00303486	22.3741
RA	glycerol	rs9374302	A	G	-0.0141	0.000198808	0.959051	1.02078e-05	0.0027	1.716e-07	0.0036957	27.2642
RA	glycerol	rs9878149	A	G	0.0117	0.000170956	0.182881	-0.000227703	0.0026	5.478e-06	0.00274679	20.2445
SLE	2-methoxyacetaminophen sulfate	rs10027220	T	C	-0.338	0.081464	0.80794	0.0198026	0.0744	5.58e-06	0.452222	18.9878
SLE	3-methoxyacetaminophen sulfate	rs10044695	A	G	0.3085	0.112278	0.243212	-0.131028	0.0599	2.583e-07	0.0254187	26.4729
SLE	4-methoxyacetaminophen sulfate	rs10046447	T	C	-0.1182	0.0672045	0.882295	0.00995033	0.0257	4.195e-06	0.0203755	21.1112
SLE	5-methoxyacetaminophen sulfate	rs10085014	T	C	0.3374	0.128949	0.00236352	-0.392042	0.0743	5.58e-06	0.452008	18.9714
SLE	6-methoxyacetaminophen sulfate	rs10100951	T	G	-0.3367	0.119675	0.285444	-0.127833	0.0741	5.58e-06	0.452315	18.9949
SLE	7-methoxyacetaminophen sulfate	rs10120414	T	C	-0.3416	0.0657698	0.303612	0.0676586	0.073	2.872e-06	0.46692	20.1455
SLE	8-methoxyacetaminophen sulfate	rs10132956	A	G	-0.3367	0.125627	0.406135	0.10436	0.0741	5.58e-06	0.452315	18.9949
SLE	9-methoxyacetaminophen sulfate	rs10157030	T	C	0.3336	0.0580366	0.862516	0.0100503	0.0754	9.654e-06	0.439152	18.0093
SLE	10-methoxyacetaminophen sulfate	rs10220710	T	G	0.338	0.107189	0.325638	0.105361	0.0744	5.471e-06	0.452222	18.9878
SLE	11-methoxyacetaminophen sulfate	rs10229296	A	G	0.3367	0.0825489	0.903097	0.0100503	0.0741	5.58e-06	0.452315	18.9949
SLE	12-methoxyacetaminophen sulfate	rs10252504	T	C	-0.339	0.132314	0.425864	-0.105361	0.0738	4.365e-06	0.457703	19.4122
SLE	13-methoxyacetaminophen sulfate	rs10274397	T	G	0.348	0.0950505	0.118409	-0.14842	0.0745	2.987e-06	0.466035	20.074
SLE	14-methoxyacetaminophen sulfate	rs10274897	T	G	0.3367	0.16233	0.851161	0.0304592	0.0741	5.58e-06	0.452315	18.9949
SLE	15-methoxyacetaminophen sulfate	rs10276616	T	G	-0.3374	0.0699426	0.885742	-0.0100503	0.0743	5.58e-06	0.452008	18.9714
SLE	16-methoxyacetaminophen sulfate	rs1038697	T	C	-0.1708	0.140719	0.885842	-0.0202027	0.0367	3.241e-06	0.464201	19.9265
SLE	17-methoxyacetaminophen sulfate	rs10415374	A	G	-0.3327	0.0441898	0.269548	0.0487902	0.0723	4.228e-06	0.458585	19.4813
SLE	18-methoxyacetaminophen sulfate	rs10447967	T	G	-0.3411	0.0400419	0.803749	0.00995033	0.0751	5.58e-06	0.452106	18.9789
SLE	19-methoxyacetaminophen sulfate	rs10471169	T	C	-0.1783	0.0633928	0.875274	0.00995033	0.036	7.429e-07	0.495255	22.5676
SLE	20-methoxyacetaminophen sulfate	rs10486289	A	G	0.3373	0.126419	0.37001	-0.113329	0.0743	5.617e-06	0.451862	18.9602
SLE	21-methoxyacetaminophen sulfate	rs10494913	A	G	-0.3367	0.101894	0.845905	0.0198026	0.0741	5.58e-06	0.452315	18.9949
SLE	22-methoxyacetaminophen sulfate	rs10495116	A	C	0.3075	0.0970967	0.0025765	-0.29267	0.063	1.058e-06	0.0228893	23.7768
SLE	23-methoxyacetaminophen sulfate	rs10766002	A	G	0.1241	0.0413995	0.625554	0.0202027	0.0263	2.284e-06	0.471073	20.4842
SLE	24-methoxyacetaminophen sulfate	rs10776859	T	C	0.3367	0.162386	0.0526175	0.314711	0.0741	5.58e-06	0.452315	18.9949
SLE	25-methoxyacetaminophen sulfate	rs10783298	A	G	0.1706	0.0554613	0.58287	0.0304592	0.0368	3.468e-06	0.462265	19.772
SLE	26-methoxyacetaminophen sulfate	rs10830676	T	G	-0.3367	0.0566344	0.174175	0.076961	0.0741	5.58e-06	0.452315	18.9949
SLE	27-methoxyacetaminophen sulfate	rs10838566	T	C	0.3367	0.0719442	0.8889	0.0100503	0.0741	5.58e-06	0.452315	18.9949
SLE	28-methoxyacetaminophen sulfate	rs10842538	T	C	-0.1888	0.0611828	0.311863	-0.0618754	0.0415	5.272e-06	0.0199451	20.6563
SLE	29-methoxyacetaminophen sulfate	rs10864476	A	G	0.3367	0.11012	0.788373	-0.0295588	0.0741	5.58e-06	0.452315	18.9949
SLE	30-methoxyacetaminophen sulfate	rs10917221	T	C	0.3367	0.0661736	0.0140514	0.162519	0.0741	5.58e-06	0.452315	18.9949
SLE	31-methoxyacetaminophen sulfate	rs10934820	T	C	-0.3367	0.0959585	0.758054	0.0295588	0.0741	5.58e-06	0.452315	18.9949
SLE	32-methoxyacetaminophen sulfate	rs10961091	T	C	0.1683	0.0843479	0.422473	-0.0676586	0.0371	5.58e-06	0.4515	18.9325
SLE	33-methoxyacetaminophen sulfate	rs10973779	A	G	-0.3367	0.0946619	0.606263	0.0487902	0.0741	5.58e-06	0.452315	18.9949
SLE	34-methoxyacetaminophen sulfate	rs11004576	T	C	-0.3367	0.0646439	0.233835	0.076961	0.0741	5.58e-06	0.452315	18.9949
SLE	35-methoxyacetaminophen sulfate	rs11004724	T	G	0.3463	0.107093	0.0750827	-0.19062	0.0757	4.81e-06	0.455661	19.2531
SLE	36-methoxyacetaminophen sulfate	rs11019667	T	C	-0.3367	0.104651	0.696479	-0.040822	0.0741	5.58e-06	0.452315	18.9949
SLE	37-methoxyacetaminophen sulfate	rs11032476	A	G	-0.3367	0.0622177	0.528446	0.0392207	0.0741	5.58e-06	0.452315	18.9949
SLE	38-methoxyacetaminophen sulfate	rs11038541	T	C	-0.2283	0.092996	0.257232	0.105361	0.0505	6.225e-06	0.0197	20.3974
SLE	39-methoxyacetaminophen sulfate	rs11041611	T	C	0.3374	0.0723542	0.0911885	-0.122218	0.0743	5.58e-06	0.452008	18.9714
SLE	40-methoxyacetaminophen sulfate	rs11057970	T	C	-0.1683	0.0673015	0.544147	-0.040822	0.0371	5.58e-06	0.4515	18.9325
SLE	41-methoxyacetaminophen sulfate	rs11067315	T	C	-0.3367	0.0649553	0.452572	0.0487902	0.0741	5.58e-06	0.452315	18.9949
SLE	42-methoxyacetaminophen sulfate	rs11112162	T	C	-0.3386	0.109399	0.110996	-0.174353	0.0739	4.6e-06	0.456445	19.314
SLE	43-methoxyacetaminophen sulfate	rs11121715	T	C	0.2845	0.0741024	0.244848	-0.0861777	0.0618	4.116e-06	0.0204131	21.1511
SLE	44-methoxyacetaminophen sulfate	rs11183923	A	C	-0.3367	0.038601	0.600714	-0.0202027	0.0741	5.58e-06	0.452315	18.9949
SLE	45-methoxyacetaminophen sulfate	rs11198080	A	C	-0.3367	0.0666023	0.539928	-0.040822	0.0741	5.58e-06	0.452315	18.9949
SLE	46-methoxyacetaminophen sulfate	rs11202938	A	G	0.3367	0.0978891	0.762681	-0.0295588	0.0741	5.58e-06	0.452315	18.9949
SLE	47-methoxyacetaminophen sulfate	rs11228559	T	C	-0.3367	0.0477946	0.678635	0.0198026	0.0741	5.58e-06	0.452315	18.9949
SLE	48-methoxyacetaminophen sulfate	rs11256010	T	C	0.3367	0.101911	0.567483	-0.0582689	0.0741	5.58e-06	0.452315	18.9949
SLE	49-methoxyacetaminophen sulfate	rs11257897	T	C	0.3384	0.13606	0.438714	0.105361	0.0743	5.321e-06	0.453475	19.0841
SLE	50-methoxyacetaminophen sulfate	rs11608731	T	G	0.1062	0.0468403	0.0440677	0.0943107	0.0223	1.82e-06	0.0218142	22.6352
SLE	51-methoxyacetaminophen sulfate	rs11612522	T	C	-0.3374	0.103441	0.216531	-0.127833	0.0743	5.58e-06	0.452008	18.9714
SLE	52-methoxyacetaminophen sulfate	rs11613732	T	C	-0.3377	0.0972367	0.391162	-0.0833816	0.0744	5.58e-06	0.451782	18.9541
SLE	53-methoxyacetaminophen sulfate	rs11664692	A	G	-0.1683	0.124336	0.396782	-0.105361	0.0371	5.58e-06	0.4515	18.9325
SLE	54-methoxyacetaminophen sulfate	rs11672123	A	G	-0.2949	0.0767059	0.796281	0.0198026	0.0647	5.184e-06	0.0200188	20.7341
SLE	55-methoxyacetaminophen sulfate	rs1169758	A	G	0.0683	0.0303349	0.505418	-0.0202027	0.0153	8.467e-06	0.0192181	19.8886
SLE	56-methoxyacetaminophen sulfate	rs1174851	A	G	-0.3367	0.0501868	0.543906	-0.0304592	0.0741	5.58e-06	0.452315	18.9949
SLE	57-methoxyacetaminophen sulfate	rs11753364	A	G	0.3327	0.126636	0.0109784	-0.322084	0.0752	9.618e-06	0.439129	18.0077
SLE	58-methoxyacetaminophen sulfate	rs11753418	A	G	-0.3374	0.0567565	0.275629	-0.0618754	0.0741	5.318e-06	0.453344	19.074
SLE	59-methoxyacetaminophen sulfate	rs11770198	A	G	0.333	0.147903	0.238463	0.174353	0.0753	9.848e-06	0.438919	17.9923
SLE	60-methoxyacetaminophen sulfate	rs11826948	A	G	0.3427	0.07761	0.38333	-0.0676586	0.0737	3.359e-06	0.463771	19.8921
SLE	61-methoxyacetaminophen sulfate	rs11856508	T	C	0.3367	0.151225	0.532861	0.0943107	0.0741	5.58e-06	0.452315	18.9949
SLE	62-methoxyacetaminophen sulfate	rs11878031	T	G	-0.3374	0.0823978	0.719795	0.0295588	0.0743	5.58e-06	0.452008	18.9714
SLE	63-methoxyacetaminophen sulfate	rs11893311	A	G	0.2928	0.0479791	0.834079	-0.0100503	0.0654	7.702e-06	0.0193281	20.0047
SLE	64-methoxyacetaminophen sulfate	rs11916772	T	C	0.3374	0.14005	0.456173	-0.10436	0.0743	5.58e-06	0.452008	18.9714
SLE	65-methoxyacetaminophen sulfate	rs11943366	A	G	-0.3377	0.0836365	0.904351	-0.0100503	0.0741	5.103e-06	0.453785	19.1079
SLE	66-methoxyacetaminophen sulfate	rs11948317	A	C	-0.3367	0.0819049	0.805171	-0.0202027	0.0741	5.58e-06	0.452315	18.9949
SLE	67-methoxyacetaminophen sulfate	rs11957930	A	G	-0.2362	0.0652874	0.761649	0.0198026	0.0515	4.582e-06	0.0202644	20.9938
SLE	68-methoxyacetaminophen sulfate	rs11964805	A	G	-0.3374	0.0783072	0.897876	-0.0100503	0.0743	5.58e-06	0.452008	18.9714
SLE	69-methoxyacetaminophen sulfate	rs12036516	A	G	0.3396	0.0729595	0.396394	0.0618754	0.0741	4.556e-06	0.456567	19.3235
SLE	70-methoxyacetaminophen sulfate	rs12122792	A	G	-0.1811	0.091139	0.16073	-0.127833	0.0332	4.866e-08	0.028426	29.6965
SLE	71-methoxyacetaminophen sulfate	rs12189492	A	G	0.3379	0.0784679	0.11934	-0.122218	0.0743	5.375e-06	0.452742	19.0277
SLE	72-methoxyacetaminophen sulfate	rs1219976	A	G	-0.3367	0.096659	0.0066411	0.262364	0.0741	5.58e-06	0.452315	18.9949
SLE	73-methoxyacetaminophen sulfate	rs12226635	T	C	-0.3367	0.0886649	0.73885	0.0295588	0.0741	5.58e-06	0.452315	18.9949
SLE	74-methoxyacetaminophen sulfate	rs12246360	A	C	0.2665	0.090537	0.0957392	0.150823	0.0537	6.934e-07	0.0236446	24.5805
SLE	75-methoxyacetaminophen sulfate	rs12285787	T	G	-0.3367	0.145067	0.786881	0.0392207	0.0741	5.58e-06	0.452315	18.9949
SLE	76-methoxyacetaminophen sulfate	rs12327061	T	C	0.3367	0.0609641	0.617339	0.0304592	0.0741	5.58e-06	0.452315	18.9949
SLE	77-methoxyacetaminophen sulfate	rs12377744	T	C	-0.3323	0.0768904	0.170603	-0.105361	0.0728	4.948e-06	0.454568	19.1684
SLE	78-methoxyacetaminophen sulfate	rs12405026	A	G	-0.1683	0.0769973	0.897176	0.00995033	0.0371	5.58e-06	0.4515	18.9325
SLE	79-methoxyacetaminophen sulfate	rs12416036	T	C	0.3391	0.0913017	0.824879	0.0202027	0.073	3.361e-06	0.463265	19.8517
SLE	80-methoxyacetaminophen sulfate	rs12583363	T	C	0.3419	0.0705105	0.221633	-0.0861777	0.0737	3.455e-06	0.462609	19.7994
SLE	81-methoxyacetaminophen sulfate	rs12607891	A	G	0.3374	0.131844	0.353933	-0.122218	0.0743	5.58e-06	0.452008	18.9714
SLE	82-methoxyacetaminophen sulfate	rs12758010	A	G	-0.3386	0.103388	0.00900741	0.270027	0.0739	4.6e-06	0.456445	19.314
SLE	83-methoxyacetaminophen sulfate	rs12777389	T	C	-0.3403	0.11762	0.67828	0.0487902	0.0748	5.315e-06	0.452926	19.0418
SLE	84-methoxyacetaminophen sulfate	rs12857335	T	G	0.3328	0.0688083	0.0310049	-0.14842	0.075	9e-06	0.44059	18.1147
SLE	85-methoxyacetaminophen sulfate	rs12867467	T	C	-0.3372	0.110409	0.450125	-0.0833816	0.0749	6.768e-06	0.447734	18.6466
SLE	86-methoxyacetaminophen sulfate	rs12902028	A	G	-0.3367	0.101935	0.632196	0.0487902	0.0741	5.58e-06	0.452315	18.9949
SLE	87-methoxyacetaminophen sulfate	rs12950011	T	C	0.0861	0.0303637	0.514284	-0.0198026	0.0188	4.659e-06	0.0202071	20.9332
SLE	88-methoxyacetaminophen sulfate	rs13061003	T	C	-0.3406	0.0399289	0.00453597	0.113329	0.0739	4.068e-06	0.459369	19.5429
SLE	89-methoxyacetaminophen sulfate	rs13326335	T	C	-0.3367	0.0660537	0.552666	0.0392207	0.0741	5.58e-06	0.452315	18.9949
SLE	90-methoxyacetaminophen sulfate	rs13329052	T	C	0.3543	0.106175	0.416989	-0.0861777	0.0758	2.909e-06	0.466355	20.0998
SLE	91-methoxyacetaminophen sulfate	rs13337056	A	G	-0.339	0.0913107	0.824896	-0.0202027	0.0738	4.365e-06	0.457703	19.4122
SLE	92-methoxyacetaminophen sulfate	rs13385838	A	G	-0.1364	0.0383907	0.605981	0.0198026	0.029	2.608e-06	0.0212895	22.0789
SLE	93-methoxyacetaminophen sulfate	rs13410411	A	G	0.3374	0.0971546	0.126595	-0.14842	0.0743	5.58e-06	0.452008	18.9714
SLE	94-methoxyacetaminophen sulfate	rs1355540	A	G	0.3374	0.0785125	0.800869	-0.0198026	0.0743	5.58e-06	0.452008	18.9714
SLE	95-methoxyacetaminophen sulfate	rs1358551	T	C	0.3374	0.0675955	0.561762	-0.0392207	0.0743	5.58e-06	0.452008	18.9714
SLE	96-methoxyacetaminophen sulfate	rs1360391	A	C	-0.3404	0.13225	0.698126	-0.0512933	0.0736	3.793e-06	0.461098	19.6794
SLE	97-methoxyacetaminophen sulfate	rs1368009	A	G	0.3374	0.109217	0.506393	0.0725707	0.0743	5.58e-06	0.452008	18.9714
SLE	98-methoxyacetaminophen sulfate	rs1444113	A	C	-0.297	0.116925	0.419902	-0.0943107	0.064	3.454e-06	0.0207363	21.493
SLE	99-methoxyacetaminophen sulfate	rs1468284	T	C	0.161	0.148856	0.526361	0.0943107	0.0346	3.219e-06	0.464118	19.9199
SLE	100-methoxyacetaminophen sulfate	rs1472170	T	G	-0.3405	0.0781412	0.898673	0.00995033	0.0746	5.015e-06	0.454544	19.1666
SLE	101-methoxyacetaminophen sulfate	rs1472292	A	G	0.3374	0.0495837	0.120628	-0.076961	0.0743	5.58e-06	0.452008	18.9714
SLE	102-methoxyacetaminophen sulfate	rs1473864	A	C	-0.3374	0.0361436	0.399381	-0.0304592	0.0743	5.58e-06	0.452008	18.9714
SLE	103-methoxyacetaminophen sulfate	rs1513215	T	G	0.3367	0.0880434	0.0239111	-0.198851	0.0741	5.58e-06	0.452315	18.9949
SLE	104-methoxyacetaminophen sulfate	rs1535938	T	C	-0.3386	0.0862779	0.473273	-0.0618754	0.0739	4.6e-06	0.456445	19.314
SLE	105-methoxyacetaminophen sulfate	rs1585145	A	G	0.1683	0.112016	0.663153	-0.0487902	0.0371	5.58e-06	0.4515	18.9325
SLE	106-methoxyacetaminophen sulfate	rs1609916	A	G	-0.3367	0.108837	0.22863	0.131028	0.0741	5.58e-06	0.452315	18.9949
SLE	107-methoxyacetaminophen sulfate	rs1636949	A	C	-0.3374	0.0639066	0.445189	0.0487902	0.0743	5.58e-06	0.452008	18.9714
SLE	108-methoxyacetaminophen sulfate	rs1645773	A	G	-0.3367	0.0600067	0.226518	-0.0725707	0.0741	5.58e-06	0.452315	18.9949
SLE	109-methoxyacetaminophen sulfate	rs1676300	T	C	-0.3244	0.0883187	0.643929	-0.040822	0.0699	3.482e-06	0.462806	19.815
SLE	110-methoxyacetaminophen sulfate	rs16824664	A	C	-0.3386	0.102352	0.0892134	0.173953	0.0739	4.6e-06	0.456445	19.314
SLE	111-methoxyacetaminophen sulfate	rs16827187	T	C	-0.3367	0.0904804	0.664671	0.0392207	0.0741	5.58e-06	0.452315	18.9949
SLE	112-methoxyacetaminophen sulfate	rs16837093	A	G	0.3399	0.0868342	0.651504	-0.0392207	0.0729	3.103e-06	0.465119	20.0002
SLE	113-methoxyacetaminophen sulfate	rs16849237	A	G	-0.3367	0.0630171	0.018511	0.14842	0.0741	5.58e-06	0.452315	18.9949
SLE	114-methoxyacetaminophen sulfate	rs16856275	T	C	0.3383	0.0837482	0.0294788	-0.182322	0.0739	4.746e-06	0.456005	19.2798
SLE	115-methoxyacetaminophen sulfate	rs16856874	A	G	-0.1442	0.0609562	0.233835	-0.0725707	0.0324	8.273e-06	0.0191048	19.769
SLE	116-methoxyacetaminophen sulfate	rs16859878	T	C	-0.1683	0.120547	0.607749	-0.0618754	0.0371	5.58e-06	0.4515	18.9325
SLE	117-methoxyacetaminophen sulfate	rs16863208	A	G	0.3379	0.11465	0.253099	0.131028	0.0741	5.156e-06	0.454078	19.1306
SLE	118-methoxyacetaminophen sulfate	rs16864792	T	C	-0.1704	0.0768834	0.0690876	0.139762	0.0368	3.598e-06	0.461682	19.7257
SLE	119-methoxyacetaminophen sulfate	rs16869484	A	G	0.3374	0.0647833	0.296308	-0.0676586	0.0743	5.58e-06	0.452008	18.9714
SLE	120-methoxyacetaminophen sulfate	rs16877016	A	G	-0.3396	0.0494247	0.549802	0.0295588	0.0729	3.181e-06	0.46468	19.9649
SLE	121-methoxyacetaminophen sulfate	rs16890511	T	C	0.3367	0.0929601	0.158684	-0.131028	0.0741	5.58e-06	0.452315	18.9949
SLE	122-methoxyacetaminophen sulfate	rs16894341	T	C	0.2045	0.0711809	0.18519	0.0943107	0.0457	7.651e-06	0.0193092	19.9848
SLE	123-methoxyacetaminophen sulfate	rs16894362	T	C	-0.3367	0.131486	0.637936	-0.0618754	0.0741	5.58e-06	0.452315	18.9949
SLE	124-methoxyacetaminophen sulfate	rs16901935	A	G	0.3367	0.0716109	0.568642	0.040822	0.0741	5.58e-06	0.452315	18.9949
SLE	125-methoxyacetaminophen sulfate	rs16926097	T	G	0.3386	0.128121	0.318397	0.127833	0.0739	4.6e-06	0.456445	19.314
SLE	126-methoxyacetaminophen sulfate	rs16927166	T	C	0.3367	0.194981	0.958891	0.0100503	0.0741	5.58e-06	0.452315	18.9949
SLE	127-methoxyacetaminophen sulfate	rs16936983	A	G	0.2563	0.116146	0.292675	-0.122218	0.0541	2.126e-06	0.0215924	22.4
SLE	128-methoxyacetaminophen sulfate	rs16943260	A	G	0.3374	0.126787	0.645816	-0.0582689	0.0743	5.58e-06	0.452008	18.9714
SLE	129-methoxyacetaminophen sulfate	rs16944662	A	G	0.3344	0.124015	0.558428	-0.0725707	0.075	8.226e-06	0.442955	18.2893
SLE	130-methoxyacetaminophen sulfate	rs16954769	A	G	-0.3423	0.130308	0.0581674	0.24686	0.0753	5.527e-06	0.452528	19.0113
SLE	131-methoxyacetaminophen sulfate	rs16960341	T	C	-0.3372	0.129218	0.465478	-0.0943107	0.0742	5.429e-06	0.452382	19.0001
SLE	132-methoxyacetaminophen sulfate	rs16997544	T	C	-0.3367	0.0723284	0.780001	-0.0202027	0.0741	5.58e-06	0.452315	18.9949
SLE	133-methoxyacetaminophen sulfate	rs16998847	A	G	-0.3367	0.122899	0.32	0.122218	0.0741	5.58e-06	0.452315	18.9949
SLE	134-methoxyacetaminophen sulfate	rs17027472	T	C	0.3374	0.0964635	0.274731	0.105361	0.0743	5.58e-06	0.452008	18.9714
SLE	135-methoxyacetaminophen sulfate	rs17029741	T	C	-0.1683	0.118863	0.340367	0.113329	0.0371	5.58e-06	0.4515	18.9325
SLE	136-methoxyacetaminophen sulfate	rs17030263	T	G	-0.3367	0.110853	0.599135	0.0582689	0.0741	5.58e-06	0.452315	18.9949
SLE	137-methoxyacetaminophen sulfate	rs17031781	T	C	-0.3374	0.0616129	0.428429	0.0487902	0.0743	5.58e-06	0.452008	18.9714
SLE	138-methoxyacetaminophen sulfate	rs17061604	A	G	-0.3399	0.126731	0.685668	-0.0512933	0.0738	4.116e-06	0.45902	19.5154
SLE	139-methoxyacetaminophen sulfate	rs17068330	A	G	0.3398	0.0986241	0.492697	-0.0676586	0.0737	4.047e-06	0.459547	19.5569
SLE	140-methoxyacetaminophen sulfate	rs17076137	T	C	-0.3367	0.143957	0.944894	0.00995033	0.0741	5.58e-06	0.452315	18.9949
SLE	141-methoxyacetaminophen sulfate	rs17079498	T	C	0.3367	0.0977847	0.285862	-0.10436	0.0741	5.58e-06	0.452315	18.9949
SLE	142-methoxyacetaminophen sulfate	rs17085716	A	C	0.3374	0.124677	0.00826019	-0.329304	0.0743	5.58e-06	0.452008	18.9714
SLE	143-methoxyacetaminophen sulfate	rs17091532	A	G	-0.3441	0.0580616	0.0240265	0.131028	0.073	2.462e-06	0.470552	20.4414
SLE	144-methoxyacetaminophen sulfate	rs17093221	T	C	-0.1649	0.0721838	0.586892	0.0392207	0.0348	2.161e-06	0.0216012	22.4093
SLE	145-methoxyacetaminophen sulfate	rs17098188	T	C	-0.3367	0.0557491	0.357534	-0.0512933	0.0741	5.58e-06	0.452315	18.9949
SLE	146-methoxyacetaminophen sulfate	rs17098805	T	C	0.3374	0.139882	0.500174	0.0943107	0.0741	5.318e-06	0.453344	19.074
SLE	147-methoxyacetaminophen sulfate	rs17100461	T	G	0.3367	0.119529	0.571363	-0.0676586	0.0741	5.58e-06	0.452315	18.9949
SLE	148-methoxyacetaminophen sulfate	rs17106046	T	C	-0.255	0.0824849	0.0349526	0.173953	0.0513	6.614e-07	0.0237192	24.6599
SLE	149-methoxyacetaminophen sulfate	rs17108927	T	C	0.3367	0.0744222	0.433656	-0.0582689	0.0741	5.58e-06	0.452315	18.9949
SLE	150-methoxyacetaminophen sulfate	rs17119874	T	C	-0.3367	0.120073	0.191018	0.157004	0.0741	5.58e-06	0.452315	18.9949
SLE	151-methoxyacetaminophen sulfate	rs17140558	A	G	0.3375	0.0617338	0.743474	0.0202027	0.0688	9.235e-07	0.490463	22.139
SLE	152-methoxyacetaminophen sulfate	rs17154872	A	G	0.3418	0.09532	0.142583	-0.139762	0.0738	3.644e-06	0.461789	19.7342
SLE	153-methoxyacetaminophen sulfate	rs17164003	T	G	0.3367	0.1358	0.305129	0.139262	0.0741	5.58e-06	0.452315	18.9949
SLE	154-methoxyacetaminophen sulfate	rs17167552	T	C	0.1704	0.11627	0.0468436	-0.231112	0.0369	3.807e-06	0.460333	19.6189
SLE	155-methoxyacetaminophen sulfate	rs17168817	T	C	-0.3367	0.0807049	0.0659083	0.14842	0.0741	5.58e-06	0.452315	18.9949
SLE	156-methoxyacetaminophen sulfate	rs17181818	T	C	-0.3433	0.11774	0.620675	0.0582689	0.074	3.464e-06	0.462621	19.8003
SLE	157-methoxyacetaminophen sulfate	rs17208695	T	G	0.3367	0.0621659	0.872833	-0.00995033	0.0741	5.58e-06	0.452315	18.9949
SLE	158-methoxyacetaminophen sulfate	rs17263168	T	C	0.3422	0.0850064	0.215182	0.105361	0.0746	4.485e-06	0.457015	19.3584
SLE	159-methoxyacetaminophen sulfate	rs17291576	A	G	0.3411	0.0877191	0.440523	0.0676586	0.0737	3.652e-06	0.461444	19.7068
SLE	160-methoxyacetaminophen sulfate	rs17397601	A	G	-0.346	0.106621	0.775125	-0.0304592	0.0758	4.955e-06	0.454577	19.1691
SLE	161-methoxyacetaminophen sulfate	rs17408309	T	G	0.3367	0.113141	0.606546	-0.0582689	0.0741	5.58e-06	0.452315	18.9949
SLE	162-methoxyacetaminophen sulfate	rs17481016	T	C	-0.2574	0.0713015	0.308773	-0.0725707	0.0572	6.782e-06	0.0195228	20.2102
SLE	163-methoxyacetaminophen sulfate	rs17628684	A	G	0.2143	0.0609422	0.502955	0.040822	0.0484	9.748e-06	0.0189121	19.5658
SLE	164-methoxyacetaminophen sulfate	rs17650707	T	G	0.3371	0.111127	0.453058	0.0833816	0.0752	7.346e-06	0.445611	18.4871
SLE	165-methoxyacetaminophen sulfate	rs17659760	A	G	-0.3372	0.0753397	0.78858	-0.0202027	0.0743	5.613e-06	0.451715	18.949
SLE	166-methoxyacetaminophen sulfate	rs17680579	A	G	0.1031	0.0490434	0.686376	-0.0198026	0.0233	9.405e-06	0.0188887	19.5412
SLE	167-methoxyacetaminophen sulfate	rs17693330	A	C	-0.3291	0.0723046	0.117026	0.113329	0.0723	5.229e-06	0.453187	19.0619
SLE	168-methoxyacetaminophen sulfate	rs17721790	A	G	-0.3367	0.0683151	0.884195	0.00995033	0.0741	5.58e-06	0.452315	18.9949
SLE	169-methoxyacetaminophen sulfate	rs17810433	A	G	-0.3362	0.126384	0.815078	0.0295588	0.0758	9.241e-06	0.44037	18.0986
SLE	170-methoxyacetaminophen sulfate	rs17825562	A	G	-0.1683	0.0908221	0.246018	-0.105361	0.0371	5.58e-06	0.4515	18.9325
SLE	171-methoxyacetaminophen sulfate	rs17829368	T	C	0.3367	0.0978949	0.153386	-0.139762	0.0741	5.58e-06	0.452315	18.9949
SLE	172-methoxyacetaminophen sulfate	rs17863803	A	G	0.3367	0.0934911	0.601761	-0.0487902	0.0741	5.58e-06	0.452315	18.9949
SLE	173-methoxyacetaminophen sulfate	rs1800777	A	G	-0.3367	0.0812158	0.446141	-0.0618754	0.0741	5.58e-06	0.452315	18.9949
SLE	174-methoxyacetaminophen sulfate	rs1865660	A	G	0.3367	0.0572278	0.72932	-0.0198026	0.0741	5.58e-06	0.452315	18.9949
SLE	175-methoxyacetaminophen sulfate	rs1865893	A	G	-0.3374	0.0508817	0.252133	0.0582689	0.0743	5.58e-06	0.452008	18.9714
SLE	176-methoxyacetaminophen sulfate	rs1891251	A	G	0.3376	0.0791573	0.708836	-0.0295588	0.073	3.762e-06	0.461061	19.6765
SLE	177-methoxyacetaminophen sulfate	rs1927455	A	G	-0.1462	0.0445156	0.649949	-0.0202027	0.0328	8.11e-06	0.0191612	19.8286
SLE	178-methoxyacetaminophen sulfate	rs1929543	T	C	0.3367	0.0715935	0.282387	-0.076961	0.0741	5.58e-06	0.452315	18.9949
SLE	179-methoxyacetaminophen sulfate	rs2029619	T	C	-0.3386	0.0649242	0.107964	0.10436	0.0739	4.6e-06	0.456445	19.314
SLE	180-methoxyacetaminophen sulfate	rs2047682	T	C	0.34	0.0505944	0.689666	0.0202027	0.0739	4.141e-06	0.458493	19.4741
SLE	181-methoxyacetaminophen sulfate	rs2053450	T	G	0.3394	0.073405	0.50626	-0.0487902	0.0746	5.334e-06	0.45294	19.0429
SLE	182-methoxyacetaminophen sulfate	rs2113097	T	C	-0.3367	0.117952	0.0220623	0.270027	0.0741	5.58e-06	0.452315	18.9949
SLE	183-methoxyacetaminophen sulfate	rs2145526	A	G	0.3374	0.0854325	0.721445	0.0304592	0.0743	5.58e-06	0.452008	18.9714
SLE	184-methoxyacetaminophen sulfate	rs2177959	T	C	0.3367	0.0477471	0.535869	-0.0295588	0.0741	5.58e-06	0.452315	18.9949
SLE	185-methoxyacetaminophen sulfate	rs2227580	T	G	-0.3384	0.13866	0.37809	0.122218	0.0745	5.58e-06	0.452143	18.9817
SLE	186-methoxyacetaminophen sulfate	rs2230944	A	G	-0.3402	0.065711	0.652833	0.0295588	0.0753	6.254e-06	0.449481	18.7787
SLE	187-methoxyacetaminophen sulfate	rs2235380	T	C	0.3385	0.0603792	0.0299999	-0.131028	0.0727	3.235e-06	0.464433	19.9451
SLE	188-methoxyacetaminophen sulfate	rs2236217	A	C	0.1637	0.0327322	0.761134	0.00995033	0.0368	8.697e-06	0.0190859	19.7491
SLE	189-methoxyacetaminophen sulfate	rs2241445	T	C	-0.3367	0.0735753	0.787816	0.0198026	0.0741	5.58e-06	0.452315	18.9949
SLE	190-methoxyacetaminophen sulfate	rs2249531	A	G	-0.0816	0.027139	0.148408	-0.0392207	0.0177	4.191e-06	0.0204706	21.2119
SLE	191-methoxyacetaminophen sulfate	rs2250600	A	G	0.3367	0.0818694	0.631894	-0.0392207	0.0741	5.58e-06	0.452315	18.9949
SLE	192-methoxyacetaminophen sulfate	rs2273617	A	G	0.1683	0.0858434	0.634403	0.040822	0.0371	5.58e-06	0.4515	18.9325
SLE	193-methoxyacetaminophen sulfate	rs231966	T	C	-0.3367	0.106729	0.0875871	0.182322	0.0741	5.58e-06	0.452315	18.9949
SLE	194-methoxyacetaminophen sulfate	rs2348445	T	C	-0.1059	0.0413971	0.343421	-0.0392207	0.0238	8.625e-06	0.019096	19.7598
SLE	195-methoxyacetaminophen sulfate	rs2361394	A	G	0.1413	0.0728545	0.781549	0.0202027	0.0306	3.75e-06	0.0205357	21.2807
SLE	196-methoxyacetaminophen sulfate	rs2410660	T	C	-0.3489	0.0331861	0.762005	-0.0100503	0.0743	2.676e-06	0.468659	20.2867
SLE	197-methoxyacetaminophen sulfate	rs2429980	A	G	0.3367	0.0849115	0.310148	-0.0861777	0.0741	5.58e-06	0.452315	18.9949
SLE	198-methoxyacetaminophen sulfate	rs2455406	T	G	0.1146	0.0332609	0.359789	0.0304592	0.0256	7.561e-06	0.444933	18.4364
SLE	199-methoxyacetaminophen sulfate	rs247858	A	C	-0.3421	0.0891061	0.20343	0.113329	0.0745	4.427e-06	0.457536	19.3991
SLE	200-methoxyacetaminophen sulfate	rs2513641	A	G	0.3374	0.104774	0.696817	0.040822	0.0743	5.558e-06	0.452008	18.9714
SLE	201-methoxyacetaminophen sulfate	rs2647998	T	C	-0.3367	0.0834968	0.485266	0.0582689	0.0741	5.58e-06	0.452315	18.9949
SLE	202-methoxyacetaminophen sulfate	rs275362	A	G	-0.1249	0.0293795	0.734849	0.00995033	0.0245	3.388e-07	0.5097	23.9101
SLE	203-methoxyacetaminophen sulfate	rs2760672	A	G	0.3374	0.0749025	0.514801	-0.0487902	0.0743	5.58e-06	0.452008	18.9714
SLE	204-methoxyacetaminophen sulfate	rs2804609	T	C	-0.2427	0.0769024	0.896021	-0.0100503	0.0541	7.125e-06	0.019405	20.0858
SLE	205-methoxyacetaminophen sulfate	rs28505465	T	C	0.3367	0.0644556	0.758668	-0.0198026	0.0741	5.58e-06	0.452315	18.9949
SLE	206-methoxyacetaminophen sulfate	rs288438	A	G	-0.1709	0.116014	0.0131486	-0.287682	0.0367	3.205e-06	0.464492	19.9499
SLE	207-methoxyacetaminophen sulfate	rs2891717	A	G	0.3226	0.0829531	0.353529	-0.076961	0.0623	2.262e-07	0.025688	26.7607
SLE	208-methoxyacetaminophen sulfate	rs2968779	T	C	-0.2532	0.0722643	0.116822	0.113329	0.0565	7.344e-06	0.019365	20.0436
SLE	209-methoxyacetaminophen sulfate	rs3008254	T	C	-0.3441	0.205482	0.961378	0.00995033	0.075	4.415e-06	0.457109	19.3658
SLE	210-methoxyacetaminophen sulfate	rs3026502	A	G	-0.3367	0.0907146	0.245459	-0.105361	0.0741	5.58e-06	0.452315	18.9949
SLE	211-methoxyacetaminophen sulfate	rs3026770	A	G	0.3374	0.145239	0.5659	0.0833816	0.0743	5.58e-06	0.452008	18.9714
SLE	212-methoxyacetaminophen sulfate	rs305550	T	C	-0.34	0.0483096	0.0509132	-0.0943107	0.0739	4.194e-06	0.458493	19.4741
SLE	213-methoxyacetaminophen sulfate	rs3169950	A	G	0.0901	0.0366524	0.581498	-0.0202027	0.0198	5.316e-06	0.0199547	20.6664
SLE	214-methoxyacetaminophen sulfate	rs3219080	T	C	-0.315	0.0963695	0.371192	0.0861777	0.0707	8.288e-06	0.442599	18.2629
SLE	215-methoxyacetaminophen sulfate	rs323090	T	C	0.3398	0.0712521	0.22648	-0.0861777	0.0748	5.572e-06	0.452197	18.9859
SLE	216-methoxyacetaminophen sulfate	rs33469	A	G	0.1639	0.0810199	0.806908	-0.0198026	0.0355	4.013e-06	0.0205292	21.2739
SLE	217-methoxyacetaminophen sulfate	rs35875280	T	G	-0.3367	0.0760695	0.894889	-0.0100503	0.0741	5.58e-06	0.452315	18.9949
SLE	218-methoxyacetaminophen sulfate	rs3763903	A	G	-0.3367	0.117999	0.376472	0.10436	0.0741	5.58e-06	0.452315	18.9949
SLE	219-methoxyacetaminophen sulfate	rs3780205	A	G	-0.1254	0.0557709	0.0421502	0.113329	0.0278	6.595e-06	0.0196147	20.3072
SLE	220-methoxyacetaminophen sulfate	rs3781723	T	C	0.3386	0.0888217	0.820072	0.0202027	0.0739	4.6e-06	0.456445	19.314
SLE	221-methoxyacetaminophen sulfate	rs3805014	A	G	-0.3367	0.116842	0.0894232	-0.198451	0.0741	5.58e-06	0.452315	18.9949
SLE	222-methoxyacetaminophen sulfate	rs3811321	A	C	0.1266	0.0626001	0.0411453	0.127833	0.0281	6.775e-06	0.0195682	20.2582
SLE	223-methoxyacetaminophen sulfate	rs3814168	A	G	-0.3379	0.117332	0.597947	-0.0618754	0.0743	5.488e-06	0.452742	19.0277
SLE	224-methoxyacetaminophen sulfate	rs3821143	T	C	0.3469	0.115815	0.367541	-0.10436	0.0761	5.164e-06	0.453906	19.1173
SLE	225-methoxyacetaminophen sulfate	rs3889670	T	C	-0.3373	0.0968393	0.24189	0.113329	0.0743	5.71e-06	0.451862	18.9602
SLE	226-methoxyacetaminophen sulfate	rs3900763	T	G	-0.3375	0.0756541	0.604164	0.0392207	0.0743	5.512e-06	0.452155	18.9827
SLE	227-methoxyacetaminophen sulfate	rs3928602	A	G	-0.3381	0.0971217	0.277997	-0.105361	0.0744	5.558e-06	0.452369	18.9991
SLE	228-methoxyacetaminophen sulfate	rs4130875	T	C	-0.3367	0.0845594	0.906327	0.00995033	0.0741	5.58e-06	0.452315	18.9949
SLE	229-methoxyacetaminophen sulfate	rs421380	T	C	0.353	0.131317	0.637503	0.0618754	0.0758	3.241e-06	0.464526	19.9526
SLE	230-methoxyacetaminophen sulfate	rs4242763	T	C	0.341	0.0968952	0.017071	-0.231112	0.0749	5.292e-06	0.453282	19.0692
SLE	231-methoxyacetaminophen sulfate	rs42441	T	G	0.2726	0.105026	0.0695248	-0.19062	0.0571	1.804e-06	0.0219196	22.747
SLE	232-methoxyacetaminophen sulfate	rs4246023	A	G	-0.3336	0.0386115	0.600814	-0.0202027	0.0753	9.458e-06	0.439806	18.0572
SLE	233-methoxyacetaminophen sulfate	rs4294438	A	G	0.2511	0.0800428	0.466631	-0.0582689	0.0525	1.716e-06	0.0219985	22.8307
SLE	234-methoxyacetaminophen sulfate	rs4313653	T	C	-0.3397	0.0722249	0.0767379	-0.127833	0.0738	4.145e-06	0.458727	19.4924
SLE	235-methoxyacetaminophen sulfate	rs4333550	A	G	0.3411	0.0863725	0.818659	-0.0198026	0.0735	3.468e-06	0.462795	19.8142
SLE	236-methoxyacetaminophen sulfate	rs436268	T	C	-0.339	0.0561278	0.718891	-0.0202027	0.0738	4.365e-06	0.457703	19.4122
SLE	237-methoxyacetaminophen sulfate	rs4379054	A	C	-0.2713	0.0930441	0.22322	0.113329	0.0603	6.886e-06	0.0195157	20.2027
SLE	238-methoxyacetaminophen sulfate	rs4427044	A	G	-0.3374	0.0589489	0.0381461	0.122218	0.0743	5.58e-06	0.452008	18.9714
SLE	239-methoxyacetaminophen sulfate	rs4441723	T	C	0.1695	0.0311489	0.746958	0.0100503	0.0369	4.319e-06	0.457703	19.4122
SLE	240-methoxyacetaminophen sulfate	rs4453029	T	C	-0.3389	0.0603301	0.613646	-0.0304592	0.0744	5.216e-06	0.45354	19.0891
SLE	241-methoxyacetaminophen sulfate	rs4505105	A	C	-0.3367	0.0734876	0.294977	0.076961	0.0741	5.58e-06	0.452315	18.9949
SLE	242-methoxyacetaminophen sulfate	rs4507748	A	G	0.3367	0.105998	0.924461	0.0100503	0.0741	5.58e-06	0.452315	18.9949
SLE	243-methoxyacetaminophen sulfate	rs4545881	T	C	0.2706	0.107751	0.777422	0.0304592	0.0609	8.948e-06	0.0190436	19.7045
SLE	244-methoxyacetaminophen sulfate	rs4589673	A	G	-0.3383	0.0630855	0.748785	-0.0202027	0.0739	4.746e-06	0.456005	19.2798
SLE	245-methoxyacetaminophen sulfate	rs4599300	T	C	-0.3367	0.0782845	0.0262791	0.173953	0.0741	5.58e-06	0.452315	18.9949
SLE	246-methoxyacetaminophen sulfate	rs4602498	A	G	-0.3367	0.109329	0.594055	0.0582689	0.0741	5.58e-06	0.452315	18.9949
SLE	247-methoxyacetaminophen sulfate	rs4602520	T	C	0.3279	0.0492726	0.681792	0.0202027	0.0726	6.205e-06	0.449327	18.7671
SLE	248-methoxyacetaminophen sulfate	rs465409	A	C	-0.337	0.104642	0.923485	-0.0100503	0.0743	5.796e-06	0.451421	18.9265
SLE	249-methoxyacetaminophen sulfate	rs4674097	A	G	0.3395	0.0848527	0.727574	-0.0295588	0.0745	5.156e-06	0.453751	19.1053
SLE	250-methoxyacetaminophen sulfate	rs4678695	A	C	-0.3379	0.0655834	0.533651	-0.040822	0.0744	5.507e-06	0.452076	18.9766
SLE	251-methoxyacetaminophen sulfate	rs4748887	A	G	0.3422	0.115043	0.590684	0.0618754	0.0753	5.58e-06	0.452383	19.0002
SLE	252-methoxyacetaminophen sulfate	rs4749376	A	G	-0.3367	0.113038	0.860934	0.0198026	0.0741	5.58e-06	0.452315	18.9949
SLE	253-methoxyacetaminophen sulfate	rs4766348	A	G	0.3367	0.155254	0.948385	0.0100503	0.0741	5.58e-06	0.452315	18.9949
SLE	254-methoxyacetaminophen sulfate	rs4786186	A	C	0.2679	0.100707	0.76913	-0.0295588	0.0589	5.339e-06	0.0199365	20.6471
SLE	255-methoxyacetaminophen sulfate	rs4787041	T	C	0.1672	0.124765	0.587621	-0.0676586	0.0352	2.049e-06	0.0217038	22.5181
SLE	256-methoxyacetaminophen sulfate	rs4805151	A	G	-0.2498	0.0588507	0.407076	0.0487902	0.0476	1.504e-07	0.0263661	27.4863
SLE	257-methoxyacetaminophen sulfate	rs4812754	A	G	0.3151	0.109797	0.169549	0.150823	0.0692	5.355e-06	0.453362	19.0753
SLE	258-methoxyacetaminophen sulfate	rs4847371	T	C	-0.3367	0.0628385	0.515929	-0.040822	0.0741	5.58e-06	0.452315	18.9949
SLE	259-methoxyacetaminophen sulfate	rs4961483	A	G	-0.338	0.0632538	0.74943	-0.0202027	0.0743	5.428e-06	0.452889	19.039
SLE	260-methoxyacetaminophen sulfate	rs4964992	T	C	0.0752	0.026385	0.121823	-0.040822	0.0165	5.014e-06	0.0200155	20.7306
SLE	261-methoxyacetaminophen sulfate	rs4965131	T	G	-0.1551	0.0495137	0.83915	-0.0100503	0.0348	8.353e-06	0.442759	18.2748
SLE	262-methoxyacetaminophen sulfate	rs5747033	A	G	0.3391	0.0613601	0.630001	-0.0295588	0.0738	4.319e-06	0.457849	19.4236
SLE	263-methoxyacetaminophen sulfate	rs588113	A	G	-0.1722	0.132144	0.425267	-0.105361	0.0366	2.527e-06	0.469623	20.3654
SLE	264-methoxyacetaminophen sulfate	rs6006868	A	G	-0.3377	0.081444	0.29	0.0861777	0.0743	5.475e-06	0.452449	19.0052
SLE	265-methoxyacetaminophen sulfate	rs6040322	A	C	0.1155	0.0670338	0.649551	0.0304592	0.0259	8.269e-06	0.0191793	19.8477
SLE	266-methoxyacetaminophen sulfate	rs6041405	A	G	0.319	0.112581	0.716902	0.040822	0.0714	7.964e-06	0.443964	18.3642
SLE	267-methoxyacetaminophen sulfate	rs6066168	A	G	-0.3223	0.118149	0.93221	-0.0100503	0.0635	3.821e-07	0.0247052	25.711
SLE	268-methoxyacetaminophen sulfate	rs6115656	T	C	0.3367	0.0807349	0.0845396	0.139262	0.0741	5.58e-06	0.452315	18.9949
SLE	269-methoxyacetaminophen sulfate	rs6122991	A	G	-0.3398	0.0791271	0.0212139	0.182322	0.0745	5.057e-06	0.454189	19.1391
SLE	270-methoxyacetaminophen sulfate	rs6136119	A	G	-0.3367	0.112611	0.519292	-0.0725707	0.0741	5.58e-06	0.452315	18.9949
SLE	271-methoxyacetaminophen sulfate	rs6137014	A	C	-0.3377	0.0977231	0.108138	0.157004	0.0744	5.563e-06	0.451782	18.9541
SLE	272-methoxyacetaminophen sulfate	rs633810	T	C	-0.1081	0.0430177	0.175566	0.0582689	0.0236	4.788e-06	0.0202133	20.9398
SLE	273-methoxyacetaminophen sulfate	rs6436032	T	C	-0.1697	0.0332586	0.764802	0.00995033	0.0372	4.935e-06	0.454271	19.1455
SLE	274-methoxyacetaminophen sulfate	rs6436102	T	C	-0.1188	0.038185	0.127019	0.0582689	0.0264	6.888e-06	0.447514	18.63
SLE	275-methoxyacetaminophen sulfate	rs6459477	T	C	0.1683	0.100069	0.840005	0.0202027	0.0371	5.58e-06	0.4515	18.9325
SLE	276-methoxyacetaminophen sulfate	rs6475096	T	C	0.3367	0.0861505	0.571166	-0.0487902	0.0741	5.58e-06	0.452315	18.9949
SLE	277-methoxyacetaminophen sulfate	rs6495823	T	C	-0.3367	0.060343	0.418776	0.0487902	0.0741	5.58e-06	0.452315	18.9949
SLE	278-methoxyacetaminophen sulfate	rs6499642	T	C	-0.3419	0.0784444	0.179232	-0.105361	0.0736	3.337e-06	0.463284	19.8532
SLE	279-methoxyacetaminophen sulfate	rs6500125	T	G	0.3374	0.110956	0.928543	-0.00995033	0.0743	5.58e-06	0.452008	18.9714
SLE	280-methoxyacetaminophen sulfate	rs6534458	T	C	-0.3044	0.0827617	0.159112	-0.116534	0.0616	7.645e-07	0.0234478	24.371
SLE	281-methoxyacetaminophen sulfate	rs653513	T	G	0.3367	0.0728136	0.0104976	0.18633	0.0741	5.58e-06	0.452315	18.9949
SLE	282-methoxyacetaminophen sulfate	rs654974	A	G	-0.3421	0.0680869	0.258335	0.076961	0.0735	3.218e-06	0.464251	19.9306
SLE	283-methoxyacetaminophen sulfate	rs6561867	A	G	-0.3367	0.0650068	0.0157271	0.157004	0.0741	5.58e-06	0.452315	18.9949
SLE	284-methoxyacetaminophen sulfate	rs6578873	T	G	-0.3042	0.0323559	0.34651	0.0304592	0.0649	2.719e-06	0.467745	20.2124
SLE	285-methoxyacetaminophen sulfate	rs6664636	A	G	0.1693	0.0542584	0.853048	0.0100503	0.0373	5.526e-06	0.451771	18.9533
SLE	286-methoxyacetaminophen sulfate	rs6677918	T	C	-0.339	0.0620071	0.27521	0.0676586	0.0738	4.365e-06	0.457703	19.4122
SLE	287-methoxyacetaminophen sulfate	rs6685155	A	G	0.3336	0.128277	0.205179	0.162519	0.0734	5.436e-06	0.452435	19.0041
SLE	288-methoxyacetaminophen sulfate	rs6693659	A	C	-0.3392	0.0841678	0.210646	-0.105361	0.0737	4.229e-06	0.458669	19.4879
SLE	289-methoxyacetaminophen sulfate	rs6711230	T	C	0.3367	0.0882119	0.656596	-0.0392207	0.0741	5.58e-06	0.452315	18.9949
SLE	290-methoxyacetaminophen sulfate	rs6734884	T	G	0.3374	0.0650458	0.546527	-0.0392207	0.0743	5.58e-06	0.452008	18.9714
SLE	291-methoxyacetaminophen sulfate	rs674341	A	G	-0.3374	0.139704	0.676612	0.0582689	0.0743	5.546e-06	0.452008	18.9714
SLE	292-methoxyacetaminophen sulfate	rs6813770	T	C	0.3374	0.0935161	0.225565	-0.113329	0.0743	5.58e-06	0.452008	18.9714
SLE	293-methoxyacetaminophen sulfate	rs6851302	A	G	0.3408	0.0969538	0.753397	0.0304592	0.0736	3.628e-06	0.461682	19.7257
SLE	294-methoxyacetaminophen sulfate	rs6873660	A	G	0.3413	0.0699028	0.333096	-0.0676586	0.0717	1.933e-06	0.475436	20.846
SLE	295-methoxyacetaminophen sulfate	rs6915443	T	C	-0.177	0.0547253	0.00298071	-0.162519	0.0384	3.99e-06	0.459417	19.5466
SLE	296-methoxyacetaminophen sulfate	rs6952699	A	C	-0.3367	0.104685	0.210702	0.131028	0.0741	5.58e-06	0.452315	18.9949
SLE	297-methoxyacetaminophen sulfate	rs696686	T	C	0.3367	0.0385154	0.442811	-0.0295588	0.0741	5.58e-06	0.452315	18.9949
SLE	298-methoxyacetaminophen sulfate	rs6987404	T	C	-0.163	0.0673524	0.386965	0.0582689	0.0346	2.533e-06	0.0213563	22.1497
SLE	299-methoxyacetaminophen sulfate	rs7015641	A	G	-0.3444	0.0970863	0.686229	0.0392207	0.073	2.381e-06	0.470986	20.4771
SLE	300-methoxyacetaminophen sulfate	rs7028666	A	G	-0.3367	0.0667674	0.464933	0.0487902	0.0741	5.58e-06	0.452315	18.9949
SLE	301-methoxyacetaminophen sulfate	rs7030552	A	G	-0.3367	0.0943748	0.605168	0.0487902	0.0741	5.58e-06	0.452315	18.9949
SLE	302-methoxyacetaminophen sulfate	rs7036654	T	C	-0.3367	0.108733	0.109637	0.173953	0.0741	5.58e-06	0.452315	18.9949
SLE	303-methoxyacetaminophen sulfate	rs7089115	A	G	-0.2733	0.0868952	0.403632	-0.0725707	0.0577	2.194e-06	0.0215839	22.391
SLE	304-methoxyacetaminophen sulfate	rs7118023	A	G	0.3367	0.137765	0.0193914	-0.322084	0.0741	5.58e-06	0.452315	18.9949
SLE	305-methoxyacetaminophen sulfate	rs7121134	T	G	-0.3388	0.131511	0.765526	0.0392207	0.0741	4.903e-06	0.455397	19.2326
SLE	306-methoxyacetaminophen sulfate	rs712404	T	C	0.3403	0.0739268	0.0586854	-0.139762	0.0734	3.577e-06	0.462305	19.7751
SLE	307-methoxyacetaminophen sulfate	rs7137664	A	G	0.3377	0.135234	0.0523709	-0.262364	0.0744	5.58e-06	0.451782	18.9541
SLE	308-methoxyacetaminophen sulfate	rs7144248	T	C	-0.3368	0.132585	0.426808	-0.105361	0.0744	6.061e-06	0.450461	18.8532
SLE	309-methoxyacetaminophen sulfate	rs7187710	T	C	0.3367	0.0887938	0.910775	-0.00995033	0.0741	5.58e-06	0.452315	18.9949
SLE	310-methoxyacetaminophen sulfate	rs7207538	T	G	0.3367	0.113495	0.462538	0.0833816	0.0741	5.58e-06	0.452315	18.9949
SLE	311-methoxyacetaminophen sulfate	rs7276997	A	G	-0.3408	0.0681869	0.321074	0.0676586	0.0735	3.513e-06	0.462358	19.7794
SLE	312-methoxyacetaminophen sulfate	rs7282706	A	G	0.3395	0.137415	0.652507	0.0618754	0.073	3.322e-06	0.463851	19.8986
SLE	313-methoxyacetaminophen sulfate	rs7305247	A	G	-0.3357	0.0628265	0.872905	-0.0100503	0.0751	7.805e-06	0.444213	18.3828
SLE	314-methoxyacetaminophen sulfate	rs733501	T	C	0.3367	0.122271	0.748387	-0.0392207	0.0741	5.58e-06	0.452315	18.9949
SLE	315-methoxyacetaminophen sulfate	rs734054	T	C	-0.3449	0.092111	0.205819	-0.116534	0.075	4.223e-06	0.458262	19.4559
SLE	316-methoxyacetaminophen sulfate	rs7529480	T	C	-0.3485	0.123722	0.108002	0.198851	0.0764	5.041e-06	0.454237	19.1429
SLE	317-methoxyacetaminophen sulfate	rs7565704	A	C	0.3367	0.0636376	0.190109	0.0833816	0.0741	5.58e-06	0.452315	18.9949
SLE	318-methoxyacetaminophen sulfate	rs757128	A	G	-0.3367	0.102269	0.689774	-0.040822	0.0741	5.58e-06	0.452315	18.9949
SLE	319-methoxyacetaminophen sulfate	rs7599592	A	G	0.3463	0.113445	0.861428	-0.0198026	0.0765	5.927e-06	0.450452	18.8525
SLE	320-methoxyacetaminophen sulfate	rs7622961	A	G	-0.3374	0.0724287	0.192876	-0.0943107	0.0743	5.58e-06	0.452008	18.9714
SLE	321-methoxyacetaminophen sulfate	rs7637257	T	C	0.3367	0.0865937	0.55362	0.0512933	0.0741	5.58e-06	0.452315	18.9949
SLE	322-methoxyacetaminophen sulfate	rs7643344	A	G	-0.3388	0.0942947	0.064454	-0.174353	0.0738	4.47e-06	0.45741	19.3893
SLE	323-methoxyacetaminophen sulfate	rs7674006	T	C	0.131	0.0358892	0.781586	-0.00995033	0.0293	7.977e-06	0.0192767	19.9504
SLE	324-methoxyacetaminophen sulfate	rs7675814	A	C	0.3441	0.0735172	0.783468	0.0202027	0.073	2.462e-06	0.470552	20.4414
SLE	325-methoxyacetaminophen sulfate	rs7722027	T	C	-0.3374	0.0477711	0.835001	0.00995033	0.0743	5.58e-06	0.452008	18.9714
SLE	326-methoxyacetaminophen sulfate	rs7722181	T	C	-0.3367	0.0815905	0.808232	0.0198026	0.0741	5.58e-06	0.452315	18.9949
SLE	327-methoxyacetaminophen sulfate	rs7746400	T	C	-0.1683	0.0551279	0.0345255	-0.116534	0.0371	5.58e-06	0.4515	18.9325
SLE	328-methoxyacetaminophen sulfate	rs7755459	A	C	0.3099	0.131197	0.938938	0.0100503	0.0632	9.492e-07	0.0230962	23.9968
SLE	329-methoxyacetaminophen sulfate	rs7760073	A	G	0.3367	0.0745952	0.683033	0.0304592	0.0741	5.58e-06	0.452315	18.9949
SLE	330-methoxyacetaminophen sulfate	rs7800783	A	G	-0.3367	0.0922176	0.0592502	0.173953	0.0741	5.58e-06	0.452315	18.9949
SLE	331-methoxyacetaminophen sulfate	rs7822943	A	G	0.3367	0.078761	0.185164	-0.10436	0.0741	5.58e-06	0.452315	18.9949
SLE	332-methoxyacetaminophen sulfate	rs7854415	T	G	-0.3374	0.0789572	0.358036	-0.0725707	0.0743	5.592e-06	0.452008	18.9714
SLE	333-methoxyacetaminophen sulfate	rs7862319	A	G	0.3256	0.0966394	0.1186	0.150823	0.0726	7.294e-06	0.445847	18.5048
SLE	334-methoxyacetaminophen sulfate	rs7912365	A	G	0.3439	0.109471	0.536541	-0.0676586	0.0752	4.847e-06	0.455499	19.2405
SLE	335-methoxyacetaminophen sulfate	rs7929278	A	G	-0.3408	0.0999429	0.842936	0.0198026	0.0736	3.628e-06	0.461682	19.7257
SLE	336-methoxyacetaminophen sulfate	rs7941283	A	G	0.3374	0.0737478	0.296684	-0.076961	0.0743	5.58e-06	0.452008	18.9714
SLE	337-methoxyacetaminophen sulfate	rs794174	A	C	0.3367	0.121728	0.0425638	0.24686	0.0741	5.58e-06	0.452315	18.9949
SLE	338-methoxyacetaminophen sulfate	rs7942841	A	G	-0.0917	0.0350468	0.244106	0.040822	0.02	4.415e-06	0.0202522	20.9809
SLE	339-methoxyacetaminophen sulfate	rs7944027	A	G	-0.3473	0.0883395	0.166512	0.122218	0.0743	2.996e-06	0.466371	20.1011
SLE	340-methoxyacetaminophen sulfate	rs7960522	T	C	-0.3405	0.0725069	0.683516	0.0295588	0.075	5.569e-06	0.451894	18.9627
SLE	341-methoxyacetaminophen sulfate	rs7967567	A	G	0.3404	0.114066	0.250676	-0.131028	0.0746	5.014e-06	0.454399	19.1553
SLE	342-methoxyacetaminophen sulfate	rs8089286	A	G	-0.3391	0.110489	0.711779	-0.040822	0.0738	4.319e-06	0.457849	19.4236
SLE	343-methoxyacetaminophen sulfate	rs8099023	A	G	0.3411	0.058499	0.863592	0.0100503	0.0735	3.468e-06	0.462795	19.8142
SLE	344-methoxyacetaminophen sulfate	rs8191547	A	G	0.3408	0.136179	0.031622	-0.29267	0.0751	5.608e-06	0.45167	18.9455
SLE	345-methoxyacetaminophen sulfate	rs8192827	A	G	0.3441	0.0977422	0.334599	0.0943107	0.073	2.462e-06	0.470552	20.4414
SLE	346-methoxyacetaminophen sulfate	rs872872	T	C	-0.3367	0.114475	0.790178	-0.0304592	0.0741	5.58e-06	0.452315	18.9949
SLE	347-methoxyacetaminophen sulfate	rs875439	A	G	0.3367	0.0843789	0.098853	0.139262	0.0741	5.58e-06	0.452315	18.9949
SLE	348-methoxyacetaminophen sulfate	rs890290	T	C	-0.3402	0.124012	0.0950561	0.207014	0.0724	2.595e-06	0.468985	20.3132
SLE	349-methoxyacetaminophen sulfate	rs897187	A	C	0.3378	0.0953281	0.273628	-0.10436	0.0739	4.908e-06	0.455272	19.2229
SLE	350-methoxyacetaminophen sulfate	rs909782	T	C	-0.3367	0.0773094	0.507023	-0.0512933	0.0741	5.58e-06	0.452315	18.9949
SLE	351-methoxyacetaminophen sulfate	rs9351099	T	C	-0.3367	0.0617774	0.525512	0.0392207	0.0741	5.58e-06	0.452315	18.9949
SLE	352-methoxyacetaminophen sulfate	rs9365901	A	G	-0.3367	0.0582076	0.245086	0.0676586	0.0741	5.58e-06	0.452315	18.9949
SLE	353-methoxyacetaminophen sulfate	rs937589	T	C	-0.3367	0.100605	0.444284	0.076961	0.0741	5.58e-06	0.452315	18.9949
SLE	354-methoxyacetaminophen sulfate	rs9389954	T	C	0.119	0.0389266	0.134421	-0.0582689	0.0246	1.299e-06	0.0224917	23.3544
SLE	355-methoxyacetaminophen sulfate	rs9395772	A	G	-0.2838	0.119187	0.804132	0.0295588	0.062	4.672e-06	0.0201866	20.9116
SLE	356-methoxyacetaminophen sulfate	rs9398363	T	C	-0.2359	0.0786138	0.389433	0.0676586	0.0509	3.576e-06	0.0206834	21.4371
SLE	357-methoxyacetaminophen sulfate	rs9401158	A	G	-0.2648	0.0564747	0.858753	-0.0100503	0.0522	3.91e-07	0.0246787	25.6827
SLE	358-methoxyacetaminophen sulfate	rs941880	A	C	-0.337	0.0584031	0.0171025	-0.139262	0.0742	5.58e-06	0.452088	18.9775
SLE	359-methoxyacetaminophen sulfate	rs9504399	A	G	-0.3459	0.0876933	0.736065	0.0295588	0.0756	4.797e-06	0.455744	19.2595
SLE	360-methoxyacetaminophen sulfate	rs9508747	T	C	-0.3367	0.0987484	0.382827	0.0861777	0.0741	5.58e-06	0.452315	18.9949
SLE	361-methoxyacetaminophen sulfate	rs9513184	A	C	0.3381	0.105709	0.226549	0.127833	0.0744	5.528e-06	0.452369	18.9991
SLE	362-methoxyacetaminophen sulfate	rs9533206	T	G	0.3376	0.0482689	0.199881	0.0618754	0.0744	5.611e-06	0.451636	18.9429
SLE	363-methoxyacetaminophen sulfate	rs9546669	A	G	0.3374	0.0417871	0.635575	-0.0198026	0.0741	5.318e-06	0.453344	19.074
SLE	364-methoxyacetaminophen sulfate	rs9559615	T	G	-0.2969	0.0771413	0.176106	0.10436	0.064	3.432e-06	0.0207226	21.4786
SLE	365-methoxyacetaminophen sulfate	rs9562411	T	G	0.1795	0.0723325	0.499977	-0.0487902	0.0394	5.198e-06	0.0200005	20.7148
SLE	366-methoxyacetaminophen sulfate	rs9574326	A	G	0.3391	0.132403	0.640265	0.0618754	0.0747	5.58e-06	0.451838	18.9584
SLE	367-methoxyacetaminophen sulfate	rs9672326	T	G	0.155	0.100998	0.409044	0.0833816	0.0338	4.435e-06	0.0202591	20.9882
SLE	368-methoxyacetaminophen sulfate	rs9685506	T	C	0.3382	0.0551887	0.291054	-0.0582689	0.0743	5.391e-06	0.453182	19.0615
SLE	369-methoxyacetaminophen sulfate	rs9689446	T	C	0.1635	0.0708434	0.676502	-0.0295588	0.0335	1.042e-06	0.022886	23.7734
SLE	370-methoxyacetaminophen sulfate	rs974135	T	C	-0.0912	0.0338563	0.768835	0.00995033	0.0183	5.844e-07	0.023839	24.7875
SLE	371-methoxyacetaminophen sulfate	rs9862737	T	G	-0.3367	0.12718	0.0398713	-0.261365	0.0741	5.58e-06	0.452315	18.9949
SLE	372-methoxyacetaminophen sulfate	rs9865616	A	G	0.2891	0.0879995	0.381812	-0.076961	0.0541	8.921e-08	0.027312	28.5001
SLE	373-methoxyacetaminophen sulfate	rs9896355	T	C	0.1683	0.0904779	0.912429	-0.00995033	0.0371	5.58e-06	0.4515	18.9325
SLE	374-methoxyacetaminophen sulfate	rs9944753	T	C	-0.339	0.102867	0.618036	-0.0512933	0.0738	4.365e-06	0.457703	19.4122
SLE	375-methoxyacetaminophen sulfate	rs9957162	A	G	0.3375	0.0740864	0.789245	-0.0198026	0.0743	5.504e-06	0.452155	18.9827
SLE	376-methoxyacetaminophen sulfate	rs9995621	A	G	-0.3367	0.115719	0.32741	0.113329	0.0741	5.58e-06	0.452315	18.9949
SLE	377-methoxyacetaminophen sulfate	rs9995884	A	G	-0.3405	0.0455878	0.389605	0.0392207	0.074	4.2e-06	0.458551	19.4786
T1D	glycerol 2-phosphate	rs10117043	T	G	0.0161	0.0324	0.8784	-0.005	0.0036	6.131e-06	0.00358308	19.9936
T1D	glycerol 3-phosphate	rs10953489	T	C	-0.0157	0.0289	0.1929	-0.0376	0.0036	9.691e-06	0.00340785	19.0125
T1D	glycerol 4-phosphate	rs1105769	A	C	-0.0135	0.0253	0.2979	-0.0263	0.0027	7.193e-07	0.00447467	24.991
T1D	glycerol 5-phosphate	rs11078249	T	C	-0.0125	0.0254	0.4977	0.0172	0.0027	3.669e-06	0.00383876	21.4258
T1D	glycerol 6-phosphate	rs1234223	C	G	0.0211	0.0394	0.0263202	0.0874	0.0045	3.017e-06	0.00393727	21.9778
T1D	glycerol 7-phosphate	rs1317833	A	G	-0.0125	0.0254	0.5475	0.0153	0.0027	4.384e-06	0.00383876	21.4258
T1D	glycerol 8-phosphate	rs1401635	C	G	-0.0125	0.0251	0.05021	-0.0492	0.0027	4.906e-06	0.00383876	21.4258
T1D	glycerol 9-phosphate	rs17359373	T	C	-0.0323	0.0271	0.0944496	-0.0454	0.0072	7.845e-06	0.0161373	20.0924
T1D	glycerol 10-phosphate	rs2041992	T	C	-0.0122	0.0276	0.3265	-0.027	0.0027	8.549e-06	0.00365738	20.4097
T1D	glycerol 11-phosphate	rs210331	A	G	-0.0179	0.0309	0.01354	-0.0762	0.0035	3.532e-07	0.0046806	26.1465
T1D	glycerol 12-phosphate	rs2114588	A	G	-0.0122	0.0254	0.6494	0.0115	0.0027	6.985e-06	0.00365738	20.4097
T1D	glycerol 13-phosphate	rs2235396	A	G	-0.012	0.0257	0.0625201	-0.0479	0.0027	9.662e-06	0.00353887	19.746
T1D	glycerol 14-phosphate	rs2253834	T	C	-0.0125	0.0236	0.0676503	-0.0431	0.0027	4.55e-06	0.00383876	21.4258
T1D	glycerol 15-phosphate	rs2422239	A	G	-0.0118	0.0235	0.00695697	-0.0634	0.0027	9.523e-06	0.00342229	19.0933
T1D	glycerol 16-phosphate	rs2982376	T	C	-0.0132	0.0257	0.6798	-0.0106	0.0028	2.932e-06	0.00397987	22.2165
T1D	glycerol 17-phosphate	rs4860118	T	C	0.0716	0.061	0.4654	0.0445	0.0151	2.044e-06	0.0179946	22.4473
T1D	glycerol 18-phosphate	rs4901357	A	G	-0.0134	0.0255	0.0371698	-0.0531	0.0028	1.25e-06	0.00410089	22.8948
T1D	glycerol 19-phosphate	rs498494	C	G	0.0258	0.0409	0.2189	-0.0502	0.0056	4.271e-06	0.0038017	21.2181
T1D	glycerol 20-phosphate	rs552279	A	G	-0.0129	0.0264	0.6978	-0.0102	0.0028	4.899e-06	0.0038017	21.2181
T1D	glycerol 21-phosphate	rs6699475	A	G	-0.0152	0.0262	0.9456	0.0018	0.0034	8.905e-06	0.00358047	19.979
T1D	glycerol 22-phosphate	rs7095787	A	T	0.0185	0.0281	0.8419	0.0056	0.0035	1.577e-07	0.00499805	27.9287
T1D	glycerol 23-phosphate	rs7121554	T	C	-0.016	0.0267	0.2383	-0.0314	0.0035	5.212e-06	0.00374321	20.8904
T1D	glycerol 24-phosphate	rs7275210	A	T	0.012	0.0239	0.0666193	0.0438	0.0027	9.306e-06	0.00353887	19.746
T1D	glycerol 25-phosphate	rs734567	T	C	0.0134	0.0249	0.9425	-0.0018	0.0027	7.832e-07	0.00440892	24.6221
T1D	glycerol 26-phosphate	rs7428286	A	G	-0.0561	0.0813	0.8196	-0.0186	0.0121	3.88e-06	0.00384989	21.4881
T1D	glycerol 27-phosphate	rs757704	A	G	0.0138	0.0236	0.708101	0.0088	0.0027	2.215e-07	0.00467482	26.1141
T1D	glycerol 28-phosphate	rs7929077	A	G	0.0121	0.0236	0.8925	0.0032	0.0027	6.631e-06	0.00359788	20.0765
T1D	glycerol 29-phosphate	rs8124907	A	G	0.0307	0.0279	0.3723	0.0249	0.0068	5.848e-06	0.0163403	20.3493
T1D	glycerol 30-phosphate	rs908690	T	C	-0.0161	0.0336	0.2073	-0.0424	0.0036	7.834e-06	0.00358308	19.9936
T1D	glycerol 31-phosphate	rs9471691	T	C	0.0139	0.0244	0.0351601	0.0513	0.0027	2.772e-07	0.00474249	26.4939
T1D	glycerol 32-phosphate	rs9608300	C	G	-0.137	0.1078	0.7715	-0.0313	0.0281	1.057e-06	0.0190043	23.7312
Notes: CeD: celiac disease, DM: dermatomyositis; IBD: inflammatory bowel disease, RA: rheumatoid arthritis; SLE: systemic lupus erythematosus; T1D: type 1 diabetes. Beta: Estimate coefficient; P-value: P-value from GWAS ; SE: standard error of coefficient estimate.

## Sheet: supplementary table5
Supplementary Table 5. Table of eight metabolites in KEGG pathway
Pathway	Total	Expected	Hits	Raw p	-log(p)	Holm adjust	FDR	Impact
Glycerolipid metabolism	16	0.04129	1	0.040694	1.3905	1	1	0.23676
Galactose metabolism	27	0.069677	1	0.067942	1.1679	1	1	0
Glycine, serine and threonine metabolism	33	0.085161	1	0.082557	1.0832	1	1	0.05034
Biosynthesis of unsaturated fatty acids	36	0.092903	1	0.0898	1.0467	1	1	0
Glycerophospholipid metabolism	36	0.092903	1	0.0898	1.0467	1	1	0.01736
Arachidonic acid metabolism	36	0.092903	1	0.0898	1.0467	1	1	0.3135

## Sheet: supplementary table6
Supplementary Table 6. Table of eight metabolites in SMPDB pathway
Pathway	Total	Expected	Hits	Raw p	-log(p)	Holm adjust	FDR	Impact
Betaine Metabolism	18	0.053518	1	0.052621	1.2788	1	1	0.1371
Glycerolipid Metabolism	23	0.068385	1	0.066902	1.1746	1	1	0.16414
Galactose Metabolism	31	0.09217	1	0.089454	1.0484	1	1	0
Methionine Metabolism	39	0.11596	1	0.11164	0.95219	1	1	0.039141
Glycine and Serine Metabolism	50	0.14866	1	0.14155	0.84909	1	1	0
Arachidonic Acid Metabolism	65	0.19326	1	0.18125	0.74173	1	1	0
